# Supplementary material for: Indirect effects of climate change altered the cannibalistic behaviour of shell-drilling gastropods in Antarctica during the Eocene
Source: R Soc Open Sci. 2018 Oct 31;5(10):181446. doi: 10.1098/rsos.181446 (PMC6227939; doi:10.1098/rsos.181446)
Supplement: Electronic Supplementary Material S1 [file rsos181446supp1.xlsx]

## Sheet: Sheet1
collection	catalog number	locality key	stratigraphic unit	shell height (mm)	drillhole (complete/ incomplete)
PRI	59027	4706	Telm 2	22
PRI	59027	4706	Telm 2	8
PRI	59027	4706	Telm 2	7
PRI	59027	4706	Telm 2	19.3
PRI	59027	4706	Telm 2	15.5
PRI	59027	4706	Telm 2	17.8
PRI	59027	4706	Telm 2	19.8
PRI	59027	4706	Telm 2	17.3
PRI	59027	4706	Telm 2	10.7
PRI	59027	4706	Telm 2	18.5
PRI	59027	4706	Telm 2	18
PRI	59027	4706	Telm 2	13.8
PRI	59027	4706	Telm 2	34
PRI	60007	4687	Telm 2	25
PRI	60007	4687	Telm 2	22
PRI	60007	4687	Telm 2	18
PRI	60007	4687	Telm 2	21
PRI	60007	4687	Telm 2	14
PRI	60007	4687	Telm 2	16
PRI	60007	4687	Telm 2	15.5
PRI	60007	4687	Telm 2	13.3
PRI	60007	4687	Telm 2	17.2
PRI	60007	4687	Telm 2	17.7
PRI	60007	4687	Telm 2	10
PRI	60007	4687	Telm 2	15.4	complete
PRI	62509	4674	Telm 2	24.4
PRI	58939	4713	Telm 2	21.8
PRI	58939	4713	Telm 2	8
PRI	58939	4713	Telm 2	15.2
PRI	58939	4713	Telm 2	12.7	complete
PRI	59278	4300	Telm 2	12
PRI	59278	4300	Telm 2	26.5
PRI	59278	4300	Telm 2	25.5
PRI	59239	4674	Telm 2	15.4
PRI	59239	4674	Telm 2	23.4
PRI	59239	4674	Telm 2	13.3
PRI	59239	4674	Telm 2	22
PRI	59239	4674	Telm 2	24
PRI	59239	4674	Telm 2	21
PRI	59239	4674	Telm 2	13.5
PRI	60337	4674	Telm 2	16
PRI	63210	5146	Telm 2	11
PRI	63210	5146	Telm 2	9.7
PRI	63210	5146	Telm 2	8.6	complete
PRI	63210	5146	Telm 2	9
PRI	59637	4272	Telm 2	33
PRI	59637	4272	Telm 2	23
PRI	59637	4272	Telm 2	22
PRI	59637	4272	Telm 2	18
PRI	59637	4272	Telm 2	19
PRI	59637	4272	Telm 2	19
PRI	59637	4272	Telm 2	13
PRI	59637	4272	Telm 2	10
PRI	59039	4705	Telm 2	14
PRI	60394	4704	Telm 2	14.3
PRI	59651	4819	Telm 2	25.6
PRI	59651	4819	Telm 2	16.7
PRI	59651	4819	Telm 2	31
PRI	59651	4819	Telm 2	38
PRI	59651	4819	Telm 2	53
PRI	59651	4819	Telm 2	31
PRI	59651	4819	Telm 2	20.7
PRI	59310	4205	Telm 2	26
PRI	59310	4205	Telm 2	20
PRI	59310	4205	Telm 2	37
PRI	59310	4205	Telm 2	32.8
PRI	59310	4205	Telm 2	37
PRI	59310	4205	Telm 2	21
PRI	59310	4205	Telm 2	42
PRI	59310	4205	Telm 2	32
PRI	59310	4205	Telm 2	24
PRI	59310	4205	Telm 2	35
PRI	59310	4205	Telm 2	23
PRI	59310	4205	Telm 2	31
PRI	59310	4205	Telm 2	35
PRI	59310	4205	Telm 2	30
PRI	59307	4205	Telm 2	21
PRI	59307	4205	Telm 2	21
PRI	59307	4205	Telm 2	18
PRI	59307	4205	Telm 2	20
PRI	59307	4205	Telm 2	19
PRI	59307	4205	Telm 2	33
PRI	59307	4205	Telm 2	27
PRI	59307	4205	Telm 2	35
PRI	59307	4205	Telm 2	41
PRI	59307	4205	Telm 2	50
PRI	59307	4205	Telm 2	33
PRI	59307	4205	Telm 2	24
PRI	59307	4205	Telm 2	20
PRI	59307	4205	Telm 2	33
PRI	59307	4205	Telm 2	23
PRI	59307	4205	Telm 2	31.7
PRI	59307	4205	Telm 2	35
PRI	59307	4205	Telm 2	32
PRI	59307	4205	Telm 2	36
PRI	59307	4205	Telm 2	20
PRI	59307	4205	Telm 2	20
PRI	59307	4205	Telm 2	30.6
PRI	59307	4205	Telm 2	34
PRI	59307	4205	Telm 2	26
PRI	59307	4205	Telm 2	29.7
PRI	59307	4205	Telm 2	35
PRI	59307	4205	Telm 2	29
PRI	59307	4205	Telm 2	36
PRI	59307	4205	Telm 2	36
PRI	59307	4205	Telm 2	25
PRI	59307	4205	Telm 2	33.5
PRI	59307	4205	Telm 2	13.3
PRI	59307	4205	Telm 2	16
PRI	59307	4205	Telm 2	16.6
PRI	59307	4205	Telm 2	15.2
PRI	59307	4205	Telm 2	17	complete
PRI	59307	4205	Telm 2	14
PRI	59307	4205	Telm 2	14.6
PRI	59307	4205	Telm 2	16
PRI	59307	4205	Telm 2	14.9
UF	YF 008 01-04b	YF 008 01-04b	Telm 2	13.8
UF	YF 008 01-04b	YF 008 01-04b	Telm 2	19
UF	YF 008 01-04b	YF 008 01-04b	Telm 2	15
UF	YF 008 01-04b	YF 008 01-04b	Telm 2	20.5
UF	YF 008 01-04b	YF 008 01-04b	Telm 2	54
UF	YF 008 01-04b	YF 008 01-04b	Telm 2	27
UF	YF 008 01-04b	YF 008 01-04b	Telm 2	27
UF	YF 008 01-04b	YF 008 01-04b	Telm 2	16
UF	YF 008 01-04b	YF 008 01-04b	Telm 2	18.4
UF	YF 008 01-04b	YF 008 01-04b	Telm 2	20.2
UF	YF 008 01-04b	YF 008 01-04b	Telm 2	22.5
UF	YF 008 01-04b	YF 008 01-04b	Telm 2	15
UF	YF 008 01-04b	YF 008 01-04b	Telm 2	16
UF	YF 008 01-04b	YF 008 01-04b	Telm 2	23
UF	YF 008 01-04b	YF 008 01-04b	Telm 2	28
UF	YF 008 01-04b	YF 008 01-04b	Telm 2	16.9
UF	YF 008 01-04b	YF 008 01-04b	Telm 2	18
UF	YF 008 01-04b	YF 008 01-04b	Telm 2	18.7
UF	YF 008 01-04b	YF 008 01-04b	Telm 2	24.3
UF	YF 008 01-04b	YF 008 01-04b	Telm 2	29
UF	YF 008 01-04b	YF 008 01-04b	Telm 2	19.4
UF	YF 008 01-04b	YF 008 01-04b	Telm 2	22
UF	YF 008 01-04b	YF 008 01-04b	Telm 2	16
UF	YF 008 01-04b	YF 008 01-04b	Telm 2	19.8
UF	YF 008 01-04b	YF 008 01-04b	Telm 2	19.8
UF	YF 008 01-04b	YF 008 01-04b	Telm 2	19.2
UF	YF 008 01-04b	YF 008 01-04b	Telm 2	21
UF	YF 008 01-04b	YF 008 01-04b	Telm 2	16.9
UF	YF 008 01-04b	YF 008 01-04b	Telm 2	13.7
UF	YF 008 01-04b	YF 008 01-04b	Telm 2	14.5
UF	YF 008 01-04b	YF 008 01-04b	Telm 2	28.6
UF	YF 008 01-04b	YF 008 01-04b	Telm 2	30
UF	YF 008 01-04b	YF 008 01-04b	Telm 2	22
UF	YF 008 01-04b	YF 008 01-04b	Telm 2	25
UF	YF 008 01-04b	YF 008 01-04b	Telm 2	25
UF	YF 008 01-04b	YF 008 01-04b	Telm 2	13
UF	YF 008 01-04b	YF 008 01-04b	Telm 2	12
UF	YF 008 01-04b	YF 008 01-04b	Telm 2	16
UF	YF 008 01-04b	YF 008 01-04b	Telm 2	26
UF	YF 008 01-04b	YF 008 01-04b	Telm 2	22
UF	YF 008 01-04b	YF 008 01-04b	Telm 2	27
UF	YF 008 01-04b	YF 008 01-04b	Telm 2	29
UF	YF 008 01-04b	YF 008 01-04b	Telm 2	25
UF	YF 008 01-04b	YF 008 01-04b	Telm 2	27
UF	YF 008 01-04b	YF 008 01-04b	Telm 2	38
UF	YF 008 01-04b	YF 008 01-04b	Telm 2	22
UF	YF 008 01-04b	YF 008 01-04b	Telm 2	14.6
UF	YF 008 01-04b	YF 008 01-04b	Telm 2	22
UF	YF 008 01-04b	YF 008 01-04b	Telm 2	23.4
UF	YF 008 01-04b	YF 008 01-04b	Telm 2	28
UF	YF 008 01-04b	YF 008 01-04b	Telm 2	22.6
UF	YF 008 01-04b	YF 008 01-04b	Telm 2	26.7
UF	YF 008 01-04b	YF 008 01-04b	Telm 2	29
UF	YF 008 01-04b	YF 008 01-04b	Telm 2	19
UF	YF 008 01-04b	YF 008 01-04b	Telm 2	21.5
UF	YF 008 01-04b	YF 008 01-04b	Telm 2	19.8
UF	YF 008 01-04b	YF 008 01-04b	Telm 2	24.4
UF	YF 008 01-04b	YF 008 01-04b	Telm 2	15
UF	YF 008 01-04a	YF 008 01-04a	Telm 2	18.7
UF	YF 008 01-04a	YF 008 01-04a	Telm 2	18
UF	YF 008 01-04a	YF 008 01-04a	Telm 2	20
UF	YF 008 01-04a	YF 008 01-04a	Telm 2	19
UF	YF 008 01-04a	YF 008 01-04a	Telm 2	18
UF	YF 008 01-04a	YF 008 01-04a	Telm 2	16
UF	YF 008 01-04a	YF 008 01-04a	Telm 2	22
UF	YF 008 01-04a	YF 008 01-04a	Telm 2	22
UF	YF 008 01-04a	YF 008 01-04a	Telm 2	20.26	incomplete
UF	YF 008 01-04a	YF 008 01-04a	Telm 2	17
UF	YF 008 01-04a	YF 008 01-04a	Telm 2	25
UF	YF 008 01-04a	YF 008 01-04a	Telm 2	26
UF	YF 008 01-04a	YF 008 01-04a	Telm 2	28
UF	YF 008 01-04a	YF 008 01-04a	Telm 2	19
UF	YF 008 01-04a	YF 008 01-04a	Telm 2	22
UF	YF 008 01-04a	YF 008 01-04a	Telm 2	23
UF	YF 008 01-04a	YF 008 01-04a	Telm 2	27
UF	YF 008 01-04a	YF 008 01-04a	Telm 2	36
UF	YF 008 01-04a	YF 008 01-04a	Telm 2	20
UF	YF 008 01-04a	YF 008 01-04a	Telm 2	19
UF	YF 008 01-04a	YF 008 01-04a	Telm 2	34
UF	YF 008 01-04a	YF 008 01-04a	Telm 2	25
UF	YF 008 01-04a	YF 008 01-04a	Telm 2	10
UF	YF 008 01-04a	YF 008 01-04a	Telm 2	12.2
UF	YF 008 01-04a	YF 008 01-04a	Telm 2	12.4
UF	YF 008 01-04a	YF 008 01-04a	Telm 2	12.8
UF	YF 008 01-04a	YF 008 01-04a	Telm 2	11
UF	YF 008 01-04a	YF 008 01-04a	Telm 2	12
UF	YF 008 01-04a	YF 008 01-04a	Telm 2	13.4
UF	YF 008 01-04a	YF 008 01-04a	Telm 2	13.5
UF	YF 008 01-04a	YF 008 01-04a	Telm 2	14
UF	YF 008 01-04a	YF 008 01-04a	Telm 2	11	complete
UF	YF 008 01-04a	YF 008 01-04a	Telm 2	14.5
UF	YF 008 01-04a	YF 008 01-04a	Telm 2	19
UF	YF 008 01-04a	YF 008 01-04a	Telm 2	12.4
UF	YF 008 01-04a	YF 008 01-04a	Telm 2	15.8
UF	YF 008 01-04a	YF 008 01-04a	Telm 2	15
UF	YF 008 01-04a	YF 008 01-04a	Telm 2	15.5
UF	YF 008 01-04a	YF 008 01-04a	Telm 2	11.7
UF	YF 008 01-04a	YF 008 01-04a	Telm 2	11.3
UF	YF 008 01-04a	YF 008 01-04a	Telm 2	11.6
UF	YF 008 01-04a	YF 008 01-04a	Telm 2	14.2	complete
UF	YF 008 01-04a	YF 008 01-04a	Telm 2	10.8	complete
UF	YF 008 01-04a	YF 008 01-04a	Telm 2	8	complete
UF	YF 008 01-04a	YF 008 01-04a	Telm 2	9.75	complete
UF	YF 008 01-04a	YF 008 01-04a	Telm 2	10	complete
UF	YF 008 01-04a	YF 008 01-04a	Telm 2	11.6
UF	YF 008 01-04a	YF 008 01-04a	Telm 2	11.2
UF	YF 008 01-04a	YF 008 01-04a	Telm 2	12.2
UF	YF 008 01-04a	YF 008 01-04a	Telm 2	12.9
UF	YF 008 01-04a	YF 008 01-04a	Telm 2	13.4
UF	YF 008 01-04a	YF 008 01-04a	Telm 2	12.5
UF	YF 008 01-04a	YF 008 01-04a	Telm 2	12.7
UF	YF 008 01-04a	YF 008 01-04a	Telm 2	13.14
UF	YF 008 01-04a	YF 008 01-04a	Telm 2	14.5
UF	YF 008 01-04a	YF 008 01-04a	Telm 2	21
UF	YF 008 01-04a	YF 008 01-04a	Telm 2	20
UF	YF 008 01-04a	YF 008 01-04a	Telm 2	18
UF	YF 008 01-04a	YF 008 01-04a	Telm 2	11
UF	YF 008 01-04a	YF 008 01-04a	Telm 2	11.5
UF	YF 008 01-04a	YF 008 01-04a	Telm 2	12
UF	YF 008 01-04a	YF 008 01-04a	Telm 2	14
UF	YF 008 01-04a	YF 008 01-04a	Telm 2	13
UF	YF 008 01-04a	YF 008 01-04a	Telm 2	15
UF	YF 008 01-04a	YF 008 01-04a	Telm 2	13
UF	YF 008 01-04a	YF 008 01-04a	Telm 2	12
UF	YF 008 01-04a	YF 008 01-04a	Telm 2	13
UF	YF 008 01-04a	YF 008 01-04a	Telm 2	12.5
UF	YF 008 01-04a	YF 008 01-04a	Telm 2	12.7
UF	YF 008 01-04a	YF 008 01-04a	Telm 2	15
UF	YF 008 01-04a	YF 008 01-04a	Telm 2	15.5
UF	YF 008 01-04a	YF 008 01-04a	Telm 2	15.5
UF	YF 008 01-04a	YF 008 01-04a	Telm 2	16.4
UF	YF 008 01-04a	YF 008 01-04a	Telm 2	10
UF	YF 008 01-04a	YF 008 01-04a	Telm 2	11
UF	YF 008 01-04a	YF 008 01-04a	Telm 2	15
UF	YF 008 01-04a	YF 008 01-04a	Telm 2	15
UF	YF 008 01-04a	YF 008 01-04a	Telm 2	13.4
UF	YF 008 01-04a	YF 008 01-04a	Telm 2	11
UF	YF 008 01-04a	YF 008 01-04a	Telm 2	13.2
UF	YF 008 01-04a	YF 008 01-04a	Telm 2	11.4
UF	YF 008 01-04a	YF 008 01-04a	Telm 2	16
UF	YF 008 01-04a	YF 008 01-04a	Telm 2	13.2
UF	YF 008 01-04a	YF 008 01-04a	Telm 2	13.3
UF	YF 008 01-04a	YF 008 01-04a	Telm 2	15
UF	YF 008 01-04a	YF 008 01-04a	Telm 2	16.3
UF	YF 008 01-04a	YF 008 01-04a	Telm 2	9
UF	YF 008 01-04a	YF 008 01-04a	Telm 2	10.5
UF	YF 008 01-04a	YF 008 01-04a	Telm 2	10
UF	YF 008 01-04a	YF 008 01-04a	Telm 2	10.8
UF	YF 008 01-04a	YF 008 01-04a	Telm 2	15
UF	YF 008 01-04a	YF 008 01-04a	Telm 2	19
UF	YF 008 01-04a	YF 008 01-04a	Telm 2	17
UF	YF 008 01-04a	YF 008 01-04a	Telm 2	15
UF	YF 008 01-04a	YF 008 01-04a	Telm 2	16
UF	YF 008 01-04a	YF 008 01-04a	Telm 2	12
UF	YF 008 01-04a	YF 008 01-04a	Telm 2	19
UF	YF 008 01-04a	YF 008 01-04a	Telm 2	11
UF	YF 008 01-04a	YF 008 01-04a	Telm 2	12
UF	YF 008 01-04a	YF 008 01-04a	Telm 2	15
UF	YF 008 01-04a	YF 008 01-04a	Telm 2	13
UF	YF 008 01-04a	YF 008 01-04a	Telm 2	12
UF	YF 008 01-04a	YF 008 01-04a	Telm 2	15
UF	YF 008 01-04a	YF 008 01-04a	Telm 2	12
UF	YF 008 01-04a	YF 008 01-04a	Telm 2	11
UF	YF 008 01-04a	YF 008 01-04a	Telm 2	5
UF	YF 008 01-04a	YF 008 01-04a	Telm 2	7
UF	YF 008 01-04a	YF 008 01-04a	Telm 2	8
UF	YF 008 01-04a	YF 008 01-04a	Telm 2	10
UF	YF 008 01-04a	YF 008 01-04a	Telm 2	8
UF	YF 008 01-04a	YF 008 01-04a	Telm 2	7
UF	YF 008 01-04a	YF 008 01-04a	Telm 2	9
UF	YF 008 01-04a	YF 008 01-04a	Telm 2	11
UF	YF 008 01-04a	YF 008 01-04a	Telm 2	12.4
UF	YF 008 01-04a	YF 008 01-04a	Telm 2	11
UF	YF 008 01-04a	YF 008 01-04a	Telm 2	9
UF	YF 008 01-04a	YF 008 01-04a	Telm 2	12
UF	YF 008 01-04a	YF 008 01-04a	Telm 2	9
UF	YF 008 01-04a	YF 008 01-04a	Telm 2	12
UF	YF 008 01-04a	YF 008 01-04a	Telm 2	9
UF	YF 008 01-04a	YF 008 01-04a	Telm 2	11
UF	YF 008 01-04a	YF 008 01-04a	Telm 2	11
UF	YF 008 01-04a	YF 008 01-04a	Telm 2	10
UF	YF 008 01-04a	YF 008 01-04a	Telm 2	12
UF	00-7	00-7	Telm 2	20.6
UF	00-7	00-7	Telm 2	14.5
UF	00-7	00-7	Telm 2	14.9
UF	00-7	00-7	Telm 2	16.8
UF	00-7	00-7	Telm 2	13.7
UF	00-7	00-7	Telm 2	7
UF	00-7	00-7	Telm 2	11
UF	00-7	00-7	Telm 2	18.7
UF	00-7	00-7	Telm 2	12.2
UF	00-7	00-7	Telm 2	13.2
UF	00-7	00-7	Telm 2	12.4
UF	00-7	00-7	Telm 2	13.3
UF	00-7	00-7	Telm 2	12.7
UF	00-7	00-7	Telm 2	9.8
UF	00-7	00-7	Telm 2	18
UF	00-7	00-7	Telm 2	20
UF	00-7	00-7	Telm 2	25
UF	00-7	00-7	Telm 2	35
UF	00-7	00-7	Telm 2	36
UF	00-7	00-7	Telm 2	22
UF	00-7	00-7	Telm 2	20
UF	00-7	00-7	Telm 2	19.8
UF	00-7	00-7	Telm 2	20
UF	00-7	00-7	Telm 2	23
UF	00-7	00-7	Telm 2	15
UF	00-7	00-7	Telm 2	17
UF	00-7	00-7	Telm 2	18
UF	00-7	00-7	Telm 2	19
UF	00-7	00-7	Telm 2	22
UF	00-7	00-7	Telm 2	15
UF	00-7	00-7	Telm 2	19
UF	00-7	00-7	Telm 2	16.5
UF	00-7	00-7	Telm 2	17.8
UF	00-7	00-7	Telm 2	18.5
UF	00-7	00-7	Telm 2	20
UF	00-7	00-7	Telm 2	16.6
UF	00-7	00-7	Telm 2	16.3
UF	00-7	00-7	Telm 2	17
UF	00-7	00-7	Telm 2	18.2
UF	00-7	00-7	Telm 2	19.8
UF	00-7	00-7	Telm 2	21
UF	00-7	00-7	Telm 2	11.8
UF	00-7	00-7	Telm 2	12
UF	00-7	00-7	Telm 2	7
UF	00-7	00-7	Telm 2	5
UF	00-7	00-7	Telm 2	7.3
UF	00-7	00-7	Telm 2	11
UF	00-7	00-7	Telm 2	7
UF	00-7	00-7	Telm 2	13.4
UF	00-7	00-7	Telm 2	10	complete
UF	00-7	00-7	Telm 2	9.5	complete
UF	00-7	00-7	Telm 2	11	incomplete
UF	00-7	00-7	Telm 2	9.6	complete
PRI	59461	4217	Telm 3	31.5
PRI	59476	4219	Telm 3	33.9
PRI	59476	4219	Telm 3	35.3
PRI	59581	4207	Telm 3	22
PRI	59581	4207	Telm 3	23
PRI	59581	4207	Telm 3	18
PRI	59137	4245	Telm 3	34
PRI	59137	4245	Telm 3	22.5
PRI	59748	4242	Telm 3	22.5
PRI	60408	4696	Telm 3	12.4
PRI	59245	4228	Telm 3	42.5
PRI	59245	4228	Telm 3	23.8
PRI	59730	4239	Telm 3	36.4
PRI	59472	4218	Telm 3	19.3
PRI	59472	4218	Telm 3	21.5
PRI	59472	4218	Telm 3	53
PRI	59472	4218	Telm 3	37.8
PRI	59472	4218	Telm 3	21
PRI	59572	4207	Telm 3	22	incomplete
PRI	59572	4207	Telm 3	43
PRI	59572	4207	Telm 3	38
PRI	59572	4207	Telm 3	24
PRI	59572	4207	Telm 3	19.7
PRI	59572	4207	Telm 3	25
PRI	59572	4207	Telm 3	30
PRI	59572	4207	Telm 3	48.7
PRI	59572	4207	Telm 3	39
PRI	59572	4207	Telm 3	8
PRI	59572	4207	Telm 3	15.7
PRI	59572	4207	Telm 3	18
PRI	59572	4207	Telm 3	12.8	complete
PRI	59572	4207	Telm 3	10.5
PRI	59572	4207	Telm 3	9.8
PRI	59192	4198	Telm 3	32
PRI	59192	4198	Telm 3	31
PRI	59192	4198	Telm 3	23
PRI	59192	4198	Telm 3	25.6
PRI	59192	4198	Telm 3	30.3
PRI	59192	4198	Telm 3	24.6
PRI	59192	4198	Telm 3	23
PRI	59192	4198	Telm 3	20.7
PRI	59192	4198	Telm 3	7.6
PRI	59343	4230	Telm 3	35
PRI	59343	4230	Telm 3	38
PRI	59343	4230	Telm 3	46
PRI	59343	4230	Telm 3	39
PRI	59212	4200	Telm 3	32
PRI	59212	4200	Telm 3	28
PRI	59212	4200	Telm 3	28
PRI	59212	4200	Telm 3	30
PRI	59212	4200	Telm 3	31
PRI	59212	4200	Telm 3	22
PRI	59480	4221	Telm 3	23
PRI	59480	4221	Telm 3	22
PRI	59480	4221	Telm 3	7
PRI	63103	4221	Telm 3	22.9
UF	YF003 00-17	YF003 00-17	Telm 3	16.5	incomplete
UF	YF003 00-17	YF003 00-17	Telm 3	12
UF	YF003 00-17	YF003 00-17	Telm 3	12
UF	YF003 00-17	YF003 00-17	Telm 3	13
UF	YF003 00-17	YF003 00-17	Telm 3	10.4
UF	YF003 00-17	YF003 00-17	Telm 3	11
UF	YF003 00-17	YF003 00-17	Telm 3	10.5
UF	YF003 00-17	YF003 00-17	Telm 3	6.8
UF	YF003 00-17	YF003 00-17	Telm 3	9.8
UF	YF003 00-17	YF003 00-17	Telm 3	10.8
UF	YF003 00-17	YF003 00-17	Telm 3	10
UF	YF003 00-17	YF003 00-17	Telm 3	9.6
UF	YF003 00-17	YF003 00-17	Telm 3	9.7
UF	YF003 00-17	YF003 00-17	Telm 3	10.3
UF	YF003 00-17	YF003 00-17	Telm 3	5.3
UF	YF003 00-17	YF003 00-17	Telm 3	17.5
UF	YF003 00-17	YF003 00-17	Telm 3	15.8
UF	YF003 00-17	YF003 00-17	Telm 3	10.4
UF	YF003 00-17	YF003 00-17	Telm 3	7.5
UF	YF003 00-17	YF003 00-17	Telm 3	7.5
UF	YF003 00-17	YF003 00-17	Telm 3	8
UF	YF003 00-17	YF003 00-17	Telm 3	10.5
UF	YF003 00-17	YF003 00-17	Telm 3	10.8
UF	YF003 00-17	YF003 00-17	Telm 3	10
UF	YF003 00-17	YF003 00-17	Telm 3	9.4
UF	YF003 00-17	YF003 00-17	Telm 3	9.9
UF	YF003 00-17	YF003 00-17	Telm 3	11.5
UF	YF003 00-17	YF003 00-17	Telm 3	7.8
UF	YF003 00-17	YF003 00-17	Telm 3	9.8
UF	YF003 00-17	YF003 00-17	Telm 3	11.2
UF	YF003 00-17	YF003 00-17	Telm 3	11.5
UF	YF003 00-17	YF003 00-17	Telm 3	10.5
UF	YF003 00-17	YF003 00-17	Telm 3	17
UF	YF003 00-17	YF003 00-17	Telm 3	15
UF	YF003 00-17	YF003 00-17	Telm 3	14
UF	YF003 00-17	YF003 00-17	Telm 3	14
UF	YF003 00-17	YF003 00-17	Telm 3	12
UF	YF003 00-17	YF003 00-17	Telm 3	15
UF	YF003 00-17	YF003 00-17	Telm 3	13
UF	YF003 00-17	YF003 00-17	Telm 3	13.4
UF	YF003 00-17	YF003 00-17	Telm 3	15.5
UF	YF003 00-17	YF003 00-17	Telm 3	15.6
UF	YF003 00-17	YF003 00-17	Telm 3	15.7
UF	YF003 00-17	YF003 00-17	Telm 3	12.6
UF	YF003 00-17	YF003 00-17	Telm 3	12.7
UF	YF003 00-17	YF003 00-17	Telm 3	13.7
UF	YF003 00-17	YF003 00-17	Telm 3	40.8
UF	YF003 00-17	YF003 00-17	Telm 3	15.4
UF	YF003 00-17	YF003 00-17	Telm 3	17.6
UF	YF003 00-17	YF003 00-17	Telm 3	17.2
UF	YF003 00-17	YF003 00-17	Telm 3	17.7
UF	YF003 00-17	YF003 00-17	Telm 3	14.6
UF	YF003 00-17	YF003 00-17	Telm 3	17.3
UF	YF003 00-17	YF003 00-17	Telm 3	15.3
UF	YF003 00-17	YF003 00-17	Telm 3	12.8
UF	YF003 00-17	YF003 00-17	Telm 3	18.3
UF	YF003 00-17	YF003 00-17	Telm 3	11.7
UF	YF003 00-17	YF003 00-17	Telm 3	13.6
UF	YF003 00-17	YF003 00-17	Telm 3	20
UF	YF003 00-17	YF003 00-17	Telm 3	14.2
UF	YF003 00-17	YF003 00-17	Telm 3	16.6
UF	YF003 00-17	YF003 00-17	Telm 3	17.1
UF	YF003 00-17	YF003 00-17	Telm 3	20.8
UF	YF003 00-17	YF003 00-17	Telm 3	20.7
UF	YF003 00-17	YF003 00-17	Telm 3	15.5
UF	YF003 00-17	YF003 00-17	Telm 3	16
UF	YF003 00-17	YF003 00-17	Telm 3	17.2
UF	YF003 00-17	YF003 00-17	Telm 3	14.3
UF	YF003 00-17	YF003 00-17	Telm 3	18.6
UF	YF003 00-17	YF003 00-17	Telm 3	15.6
UF	YF003 00-17	YF003 00-17	Telm 3	17.6
UF	YF003 00-17	YF003 00-17	Telm 3	15
UF	YF003 00-17	YF003 00-17	Telm 3	15.3
UF	YF003 00-17	YF003 00-17	Telm 3	15.9
UF	YF003 00-17	YF003 00-17	Telm 3	14
UF	YF003 00-17	YF003 00-17	Telm 3	17.8
UF	YF003 00-17	YF003 00-17	Telm 3	12.7
UF	YF003 00-17	YF003 00-17	Telm 3	12.7
UF	YF003 00-17	YF003 00-17	Telm 3	20.5
UF	YF003 00-17	YF003 00-17	Telm 3	19.2
UF	YF003 00-17	YF003 00-17	Telm 3	18.4
UF	YF003 00-17	YF003 00-17	Telm 3	11
UF	YF003 00-17	YF003 00-17	Telm 3	17
UF	YF003 00-17	YF003 00-17	Telm 3	19
UF	YF003 00-17	YF003 00-17	Telm 3	13.4
UF	YF003 00-17	YF003 00-17	Telm 3	17.2
UF	YF003 00-17	YF003 00-17	Telm 3	17.1
UF	YF003 00-17	YF003 00-17	Telm 3	14.3
UF	YF003 00-17	YF003 00-17	Telm 3	13.6
UF	YF003 00-17	YF003 00-17	Telm 3	12.8
UF	YF003 00-17	YF003 00-17	Telm 3	13.3
UF	YF003 00-17	YF003 00-17	Telm 3	16.4
UF	YF003 00-17	YF003 00-17	Telm 3	20
UF	YF003 00-17	YF003 00-17	Telm 3	16
UF	YF003 00-17	YF003 00-17	Telm 3	16
UF	YF003 00-17	YF003 00-17	Telm 3	17
UF	YF003 00-17	YF003 00-17	Telm 3	12.8
UF	YF003 00-17	YF003 00-17	Telm 3	18.8
UF	YF003 00-17	YF003 00-17	Telm 3	15.4
UF	YF003 00-17	YF003 00-17	Telm 3	15.9
UF	YF003 00-17	YF003 00-17	Telm 3	13.6
UF	YF003 00-17	YF003 00-17	Telm 3	16.9
UF	YF003 00-17	YF003 00-17	Telm 3	18
UF	YF003 00-17	YF003 00-17	Telm 3	19
UF	YF003 00-17	YF003 00-17	Telm 3	16.5
UF	YF003 00-17	YF003 00-17	Telm 3	16.9
UF	YF003 00-17	YF003 00-17	Telm 3	15.5
UF	YF003 00-17	YF003 00-17	Telm 3	15.7
UF	YF003 00-17	YF003 00-17	Telm 3	17.3
UF	YF003 00-17	YF003 00-17	Telm 3	15.6
UF	YF003 00-17	YF003 00-17	Telm 3	16
UF	YF003 00-17	YF003 00-17	Telm 3	18
UF	YF003 00-17	YF003 00-17	Telm 3	13
UF	YF003 00-17	YF003 00-17	Telm 3	16.3
UF	YF003 00-17	YF003 00-17	Telm 3	11
UF	YF003 00-17	YF003 00-17	Telm 3	16
UF	YF003 00-17	YF003 00-17	Telm 3	17.5
UF	YF003 00-17	YF003 00-17	Telm 3	15
UF	YF003 00-17	YF003 00-17	Telm 3	19
UF	YF003 00-17	YF003 00-17	Telm 3	14
UF	YF003 00-17	YF003 00-17	Telm 3	13
UF	YF003 00-17	YF003 00-17	Telm 3	15
UF	YF003 00-17	YF003 00-17	Telm 3	15
UF	YF003 00-17	YF003 00-17	Telm 3	18.6
UF	YF003 00-17	YF003 00-17	Telm 3	13.7
UF	YF003 00-17	YF003 00-17	Telm 3	11.6
UF	YF003 00-17	YF003 00-17	Telm 3	15
UF	YF003 00-17	YF003 00-17	Telm 3	20
UF	YF003 00-17	YF003 00-17	Telm 3	15.7
UF	YF003 00-17	YF003 00-17	Telm 3	25.5
UF	YF003 00-17	YF003 00-17	Telm 3	8.3
UF	YF003 00-17	YF003 00-17	Telm 3	17.5
UF	YF003 00-17	YF003 00-17	Telm 3	14.7
UF	YF003 00-17	YF003 00-17	Telm 3	14.8
UF	YF003 00-17	YF003 00-17	Telm 3	21
UF	YF003 00-17	YF003 00-17	Telm 3	16
UF	YF003 00-17	YF003 00-17	Telm 3	15.2
UF	YF003 00-17	YF003 00-17	Telm 3	18
UF	YF003 00-17	YF003 00-17	Telm 3	17
UF	YF003 00-17	YF003 00-17	Telm 3	18
UF	YF003 00-17	YF003 00-17	Telm 3	24.7
UF	YF003 00-17	YF003 00-17	Telm 3	15.2
UF	YF003 00-17	YF003 00-17	Telm 3	16
UF	YF003 00-17	YF003 00-17	Telm 3	13.1
UF	YF003 00-17	YF003 00-17	Telm 3	13.2
UF	YF003 00-17	YF003 00-17	Telm 3	15.2
UF	YF003 00-17	YF003 00-17	Telm 3	18.4
UF	YF003 00-17	YF003 00-17	Telm 3	17.3
UF	YF003 00-17	YF003 00-17	Telm 3	16.6
UF	YF003 00-17	YF003 00-17	Telm 3	13
UF	YF003 00-17	YF003 00-17	Telm 3	14.7
UF	YF003 00-17	YF003 00-17	Telm 3	15.8
UF	YF003 00-17	YF003 00-17	Telm 3	14.2
UF	YF003 00-17	YF003 00-17	Telm 3	13.5
UF	YF003 00-17	YF003 00-17	Telm 3	14.7
UF	YF003 00-17	YF003 00-17	Telm 3	14.8
UF	YF003 00-17	YF003 00-17	Telm 3	21.2
UF	YF003 00-17	YF003 00-17	Telm 3	18.4
UF	YF003 00-17	YF003 00-17	Telm 3	17.4
UF	YF003 00-17	YF003 00-17	Telm 3	14
UF	YF003 00-17	YF003 00-17	Telm 3	16.5
UF	YF003 00-17	YF003 00-17	Telm 3	19
UF	YF003 00-17	YF003 00-17	Telm 3	17
UF	YF003 00-17	YF003 00-17	Telm 3	22
UF	YF003 00-17	YF003 00-17	Telm 3	19.7
UF	YF003 00-17	YF003 00-17	Telm 3	14.7
UF	YF003 00-17	YF003 00-17	Telm 3	12.3
UF	YF003 00-17	YF003 00-17	Telm 3	11.7
UF	YF003 00-17	YF003 00-17	Telm 3	154
UF	YF003 00-17	YF003 00-17	Telm 3	15.4
UF	YF003 00-17	YF003 00-17	Telm 3	15.2
UF	YF003 00-17	YF003 00-17	Telm 3	15.8
UF	YF003 00-17	YF003 00-17	Telm 3	30
UF	YF003 00-17	YF003 00-17	Telm 3	24
UF	YF003 00-17	YF003 00-17	Telm 3	17.3
UF	YF003 00-17	YF003 00-17	Telm 3	22
UF	YF003 00-17	YF003 00-17	Telm 3	16.5
UF	YF003 00-17	YF003 00-17	Telm 3	19.7
UF	YF003 00-17	YF003 00-17	Telm 3	20
UF	YF003 00-17	YF003 00-17	Telm 3	19
UF	YF003 00-17	YF003 00-17	Telm 3	24
UF	YF003 00-17	YF003 00-17	Telm 3	21.6
UF	YF003 00-17	YF003 00-17	Telm 3	17.3
UF	YF003 00-17	YF003 00-17	Telm 3	17.5
UF	YF003 00-17	YF003 00-17	Telm 3	20
UF	YF003 00-17	YF003 00-17	Telm 3	20.7
UF	YF003 00-17	YF003 00-17	Telm 3	19.9
UF	YF003 00-17	YF003 00-17	Telm 3	34
UF	YF003 00-17	YF003 00-17	Telm 3	50
UF	YF003 00-17	YF003 00-17	Telm 3	20.5
UF	YF003 00-17	YF003 00-17	Telm 3	32
UF	YF003 00-17	YF003 00-17	Telm 3	21
UF	YF003 00-17	YF003 00-17	Telm 3	18.8
UF	YF003 00-17	YF003 00-17	Telm 3	20.3
UF	YF003 00-17	YF003 00-17	Telm 3	21.5
UF	YF003 00-17	YF003 00-17	Telm 3	22.6
UF	YF003 00-17	YF003 00-17	Telm 3	20.2
UF	YF003 00-17	YF003 00-17	Telm 3	13	incomplete
UF	YF003 00-17	YF003 00-17	Telm 3	15	incomplete
UF	YF003 00-17	YF003 00-17	Telm 3	10	complete
UF	YF003 00-17	YF003 00-17	Telm 3	14.6	incomplete
UF	YF003 00-17	YF003 00-17	Telm 3	11.8	complete
UF	YF003 00-17	YF003 00-17	Telm 3	17.3	complete
UF	YF003 00-17	YF003 00-17	Telm 3	16.5	complete
UF	YF 176 00-21	YF 176 00-21	Telm 3	24
UF	YF 176 00-21	YF 176 00-21	Telm 3	22
UF	YF 176 00-21	YF 176 00-21	Telm 3	21
UF	YF 176 00-21	YF 176 00-21	Telm 3	18
UF	YF 176 00-21	YF 176 00-21	Telm 3	16
UF	YF 176 00-21	YF 176 00-21	Telm 3	18
UF	YF 176 00-21	YF 176 00-21	Telm 3	19
UF	YF 176 00-21	YF 176 00-21	Telm 3	12
UF	YF 176 00-21	YF 176 00-21	Telm 3	38
UF	YF 176 00-21	YF 176 00-21	Telm 3	16.8
UF	YF 176 00-21	YF 176 00-21	Telm 3	26
UF	YF 176 00-21	YF 176 00-21	Telm 3	22.6
UF	YF 176 00-21	YF 176 00-21	Telm 3	22.4
UF	YF 176 00-21	YF 176 00-21	Telm 3	25
UF	YF 176 00-21	YF 176 00-21	Telm 3	15
UF	YF 176 00-21	YF 176 00-21	Telm 3	18
UF	YF 176 00-21	YF 176 00-21	Telm 3	18
UF	YF 176 00-21	YF 176 00-21	Telm 3	13.5
UF	YF 176 00-21	YF 176 00-21	Telm 3	17
UF	YF 176 00-21	YF 176 00-21	Telm 3	22
UF	YF 176 00-21	YF 176 00-21	Telm 3	28
UF	YF 176 00-21	YF 176 00-21	Telm 3	25
UF	YF 176 00-21	YF 176 00-21	Telm 3	36
UF	YF 176 00-21	YF 176 00-21	Telm 3	36
UF	YF 176 00-21	YF 176 00-21	Telm 3	29
UF	YF 176 00-21	YF 176 00-21	Telm 3	28
UF	YF 094 03-004	YF 094 03-004	Telm 3	30
UF	YF 094 03-004	YF 094 03-004	Telm 3	16
UF	YF 094 03-004	YF 094 03-004	Telm 3	13
UF	YF 094 03-004	YF 094 03-004	Telm 3	17
UF	YF 094 03-004	YF 094 03-004	Telm 3	19
UF	YF 094 03-004	YF 094 03-004	Telm 3	14
UF	YF 094 03-004	YF 094 03-004	Telm 3	11.3
UF	YF 094 03-004	YF 094 03-004	Telm 3	24.3
UF	YF 094 03-004	YF 094 03-004	Telm 3	29
UF	YF 094 03-004	YF 094 03-004	Telm 3	19.7
UF	YF 094 03-004	YF 094 03-004	Telm 3	26.6
UF	YF 094 03-004	YF 094 03-004	Telm 3	29.8
UF	YF 094 03-004	YF 094 03-004	Telm 3	30
UF	YF 094 03-004	YF 094 03-004	Telm 3	22
UF	YF 094 03-004	YF 094 03-004	Telm 3	16.3
UF	YF 094 03-004	YF 094 03-004	Telm 3	13.8
UF	YF 094 03-004	YF 094 03-004	Telm 3	15
UF	YF 094 03-004	YF 094 03-004	Telm 3	16.7
UF	YF 094 03-004	YF 094 03-004	Telm 3	17.8
UF	YF 094 03-004	YF 094 03-004	Telm 3	15.15
UF	YF 094 03-004	YF 094 03-004	Telm 3	19.8
UF	YF 094 03-004	YF 094 03-004	Telm 3	13
UF	YF 094 03-004	YF 094 03-004	Telm 3	16
UF	YF 094 03-004	YF 094 03-004	Telm 3	16
UF	YF 094 03-004	YF 094 03-004	Telm 3	19.4
UF	YF 094 03-004	YF 094 03-004	Telm 3	15
UF	YF 094 03-004	YF 094 03-004	Telm 3	43
UF	YF 094 03-004	YF 094 03-004	Telm 3	43
UF	YF 094 03-004	YF 094 03-004	Telm 3	42
UF	YF 094 03-004	YF 094 03-004	Telm 3	41
UF	YF 094 03-004	YF 094 03-004	Telm 3	40
UF	YF 094 03-004	YF 094 03-004	Telm 3	40
UF	YF 094 03-004	YF 094 03-004	Telm 3	32
UF	YF 094 03-004	YF 094 03-004	Telm 3	46
UF	YF 094 03-004	YF 094 03-004	Telm 3	38
UF	YF 094 03-004	YF 094 03-004	Telm 3	32.6
UF	YF 094 03-004	YF 094 03-004	Telm 3	15
UF	YF 094 03-004	YF 094 03-004	Telm 3	12.6
UF	YF 094 03-004	YF 094 03-004	Telm 3	13.2
UF	YF 094 03-004	YF 094 03-004	Telm 3	15.3
UF	YF 094 03-004	YF 094 03-004	Telm 3	22
PRI	58352	4201	Telm 4	45
PRI	58352	4201	Telm 4	25.7
PRI	58352	4201	Telm 4	29
PRI	58352	4201	Telm 4	28.5
PRI	58352	4201	Telm 4	39.1
PRI	58352	4201	Telm 4	47.2
PRI	58352	4201	Telm 4	36
PRI	58352	4201	Telm 4	22.4
PRI	58352	4201	Telm 4	42.6
PRI	58352	4201	Telm 4	12	complete
PRI	58352	4201	Telm 4	12.6	complete
PRI	58352	4201	Telm 4	11	complete
PRI	58352	4201	Telm 4	13.3	complete
PRI	58352	4201	Telm 4	16.4
PRI	58352	4201	Telm 4	14.6
PRI	58352	4201	Telm 4	14.8
PRI	58352	4201	Telm 4	16.4
PRI	58352	4201	Telm 4	15.4
PRI	58352	4201	Telm 4	16.6
PRI	58352	4201	Telm 4	15.1
PRI	58352	4201	Telm 4	9
PRI	58352	4201	Telm 4	11
PRI	58352	4201	Telm 4	10.8
PRI	58352	4201	Telm 4	11.4
PRI	58352	4201	Telm 4	9.9
PRI	58352	4201	Telm 4	10.8
PRI	58352	4201	Telm 4	10.3
PRI	58352	4201	Telm 4	10.6
PRI	58352	4201	Telm 4	14
PRI	58352	4201	Telm 4	15.5
PRI	58352	4201	Telm 4	7.5
PRI	58352	4201	Telm 4	14
PRI	58352	4201	Telm 4	13.2
PRI	58352	4201	Telm 4	13.5
PRI	58352	4201	Telm 4	18.3
PRI	58352	4201	Telm 4	16.6
PRI	58352	4201	Telm 4	18.4
PRI	58352	4201	Telm 4	20.2
PRI	58352	4201	Telm 4	20.6
PRI	58352	4201	Telm 4	16.5
PRI	58352	4201	Telm 4	16.3
PRI	58352	4201	Telm 4	20.3
PRI	58352	4201	Telm 4	17
PRI	58352	4201	Telm 4	22
PRI	58352	4201	Telm 4	22
PRI	58352	4201	Telm 4	18.2
PRI	58352	4201	Telm 4	17.7
PRI	58352	4201	Telm 4	18.1
PRI	58352	4201	Telm 4	16.5
PRI	63307	5070	Telm 4	17
PRI	63307	5070	Telm 4	25
PRI	63307	5070	Telm 4	19.7
PRI	63307	5070	Telm 4	20
PRI	63307	5070	Telm 4	18.3
PRI	63307	5070	Telm 4	20.7
PRI	63307	5070	Telm 4	16.7
PRI	63307	5070	Telm 4	21.5
PRI	63307	5070	Telm 4	25.3
PRI	63307	5070	Telm 4	15.7
PRI	63307	5070	Telm 4	12.5	complete
PRI	63307	5070	Telm 4	11.8
PRI	63307	5070	Telm 4	14.4
PRI	63307	5070	Telm 4	8.2
PRI	63307	5070	Telm 4	12.4
PRI	58888	4710	Telm 4	35
PRI	58888	4710	Telm 4	21.7
PRI	59270	4299	Telm 4	40.5
PRI	59270	4299	Telm 4	34.7
PRI	65487	4710	Telm 4	54
PRI	62499	4281	Telm 4	19.5
PRI	62499	4281	Telm 4	15
PRI	62499	4281	Telm 4	15.6
UF	y024	y024	Telm 4	15
UF	y024	y024	Telm 4	12
UF	y024	y024	Telm 4	11.2
UF	y024	y024	Telm 4	16
UF	y024	y024	Telm 4	15.7
UF	y024	y024	Telm 4	12
UF	y024	y024	Telm 4	18
UF	y024	y024	Telm 4	19
UF	y024	y024	Telm 4	15.8
UF	y024	y024	Telm 4	35
UF	y024	y024	Telm 4	15.1
UF	y024	y024	Telm 4	13
UF	y024	y024	Telm 4	23
UF	y024	y024	Telm 4	24
UF	YF026 01-027	YF026 01-027	Telm 4	17
UF	YF026 01-027	YF026 01-027	Telm 4	17
UF	YF026 01-027	YF026 01-027	Telm 4	15
UF	YF026 01-027	YF026 01-027	Telm 4	19
UF	YF026 01-027	YF026 01-027	Telm 4	9
UF	YF026 01-027	YF026 01-027	Telm 4	8.7
UF	YF026 01-027	YF026 01-027	Telm 4	17
UF	YF026 01-027	YF026 01-027	Telm 4	13
UF	YF026 01-027	YF026 01-027	Telm 4	17
UF	YF026 01-027	YF026 01-027	Telm 4	15
UF	YF026 01-027	YF026 01-027	Telm 4	16
UF	YF026 01-027	YF026 01-027	Telm 4	16
UF	YF026 01-027	YF026 01-027	Telm 4	12
UF	YF026 01-027	YF026 01-027	Telm 4	16
UF	YF026 01-027	YF026 01-027	Telm 4	15
UF	YF026 01-027	YF026 01-027	Telm 4	14
UF	YF026 01-027	YF026 01-027	Telm 4	12
UF	YF026 01-027	YF026 01-027	Telm 4	13.2
UF	YF026 01-027	YF026 01-027	Telm 4	17
UF	YF026 01-027	YF026 01-027	Telm 4	11
UF	YF026 01-027	YF026 01-027	Telm 4	14
UF	YF026 01-027	YF026 01-027	Telm 4	37
UF	YF026 01-027	YF026 01-027	Telm 4	28
UF	YF026 01-027	YF026 01-027	Telm 4	27
UF	YF026 01-027	YF026 01-027	Telm 4	14
UF	YF026 01-027	YF026 01-027	Telm 4	35
UF	YF026 01-027	YF026 01-027	Telm 4	41
UF	YF026 01-027	YF026 01-027	Telm 4	18
UF	YF026 01-027	YF026 01-027	Telm 4	21
UF	YF026 01-027	YF026 01-027	Telm 4	24.6
UF	YF026 01-027	YF026 01-027	Telm 4	18.8
UF	YF026 01-027	YF026 01-027	Telm 4	17.1	complete
UF	YF026 01-027	YF026 01-027	Telm 4	35
UF	YF026 01-027	YF026 01-027	Telm 4	21
UF	YF026 01-027	YF026 01-027	Telm 4	25
UF	YF026 01-027	YF026 01-027	Telm 4	24
UF	YF026 01-027	YF026 01-027	Telm 4	25
UF	YF026 01-027	YF026 01-027	Telm 4	16.5
UF	YF026 01-027	YF026 01-027	Telm 4	17.3
UF	YF026 01-027	YF026 01-027	Telm 4	17.9
UF	YF026 01-027	YF026 01-027	Telm 4	11.6
UF	YF026 01-027	YF026 01-027	Telm 4	20.4
UF	YF026 01-027	YF026 01-027	Telm 4	19
UF	YF026 01-027	YF026 01-027	Telm 4	25.8
UF	YF026 01-027	YF026 01-027	Telm 4	14
UF	17	17	Telm 4	19.7
UF	17	17	Telm 4	22.8
UF	17	17	Telm 4	20.4
UF	17	17	Telm 4	18.8
UF	17	17	Telm 4	22.9
UF	17	17	Telm 4	18.6
UF	17	17	Telm 4	17.3
UF	17	17	Telm 4	21
UF	17	17	Telm 4	18
UF	17	17	Telm 4	22.6
UF	17	17	Telm 4	17.8
UF	17	17	Telm 4	18
UF	17	17	Telm 4	18
UF	17	17	Telm 4	21.3
UF	17	17	Telm 4	33.6
UF	17	17	Telm 4	19
UF	17	17	Telm 4	19
UF	17	17	Telm 4	25
UF	17	17	Telm 4	21
UF	17	17	Telm 4	26
UF	17	17	Telm 4	20
UF	17	17	Telm 4	17
UF	17	17	Telm 4	18
UF	17	17	Telm 4	21
UF	17	17	Telm 4	22
UF	17	17	Telm 4	23
UF	17	17	Telm 4	20	complete
PRI	59444	4669	Telm 5	27.6
PRI	59444	4669	Telm 5	30.5
PRI	59444	4669	Telm 5	38.1
PRI	59444	4669	Telm 5	49.3
PRI	59444	4669	Telm 5	34.2
PRI	59444	4669	Telm 5	36.1
PRI	59444	4669	Telm 5	48.9
PRI	59444	4669	Telm 5	27.4
PRI	59444	4669	Telm 5	31
PRI	59444	4669	Telm 5	22
PRI	59444	4669	Telm 5	26.7
PRI	59444	4669	Telm 5	23.9
PRI	59444	4669	Telm 5	23.5
PRI	59444	4669	Telm 5	25.1
PRI	59444	4669	Telm 5	27.6
PRI	59444	4669	Telm 5	25
PRI	59444	4669	Telm 5	17.4
PRI	59444	4669	Telm 5	19.5
PRI	59444	4669	Telm 5	17.2
PRI	59444	4669	Telm 5	18.8
PRI	59444	4669	Telm 5	19.6
PRI	59444	4669	Telm 5	19.6
PRI	59444	4669	Telm 5	22
PRI	59444	4669	Telm 5	19.2
PRI	59444	4669	Telm 5	21.5
PRI	59444	4669	Telm 5	18.7
PRI	59444	4669	Telm 5	17.8
PRI	59444	4669	Telm 5	25
PRI	59444	4669	Telm 5	18.8
PRI	59444	4669	Telm 5	17.5
PRI	59444	4669	Telm 5	23
PRI	59444	4669	Telm 5	18.7
PRI	59444	4669	Telm 5	18.6
PRI	59444	4669	Telm 5	19.9
PRI	59444	4669	Telm 5	14
PRI	59444	4669	Telm 5	18.7
PRI	59444	4669	Telm 5	13.4
PRI	59444	4669	Telm 5	17
PRI	59444	4669	Telm 5	15.7
PRI	59444	4669	Telm 5	14
PRI	59444	4669	Telm 5	10.6
PRI	59444	4669	Telm 5	13.4
PRI	59444	4669	Telm 5	12.8
PRI	59444	4669	Telm 5	14.7
PRI	59444	4669	Telm 5	15.7
PRI	59444	4669	Telm 5	16.8
PRI	59444	4669	Telm 5	13.6
PRI	59444	4669	Telm 5	12.3
PRI	59444	4669	Telm 5	12.7
PRI	59444	4669	Telm 5	11.7
PRI	59444	4669	Telm 5	13.2
PRI	59444	4669	Telm 5	10.8
PRI	59444	4669	Telm 5	13.4
PRI	59444	4669	Telm 5	14.2
PRI	59444	4669	Telm 5	12.5
PRI	59444	4669	Telm 5	11.5
PRI	59444	4669	Telm 5	15.6
PRI	59444	4669	Telm 5	11.5
PRI	59444	4669	Telm 5	17.3
PRI	59444	4669	Telm 5	14.1
PRI	59444	4669	Telm 5	11.6
PRI	59444	4669	Telm 5	12
PRI	59444	4669	Telm 5	14.2
PRI	59444	4669	Telm 5	13.6
PRI	59444	4669	Telm 5	7.6
PRI	59444	4669	Telm 5	14.8
PRI	59444	4669	Telm 5	11.7
PRI	59444	4669	Telm 5	12.5
PRI	59444	4669	Telm 5	11.2
PRI	59444	4669	Telm 5	11.3
PRI	59444	4669	Telm 5	12.1
PRI	59444	4669	Telm 5	11.8
PRI	59444	4669	Telm 5	8.5
PRI	59444	4669	Telm 5	14.6
PRI	59444	4669	Telm 5	7.9
PRI	59444	4669	Telm 5	9.2
PRI	59444	4669	Telm 5	8.9
PRI	59444	4669	Telm 5	9.4
PRI	59444	4669	Telm 5	12
PRI	59444	4669	Telm 5	11.6
PRI	59444	4669	Telm 5	11.6
PRI	59444	4669	Telm 5	9.1
PRI	59444	4669	Telm 5	12.2
PRI	59444	4669	Telm 5	10.1
PRI	59444	4669	Telm 5	9.6
PRI	59444	4669	Telm 5	10
PRI	59444	4669	Telm 5	9.1
PRI	59444	4669	Telm 5	9.7
PRI	59444	4669	Telm 5	11.4
PRI	59444	4669	Telm 5	9.7
PRI	59444	4669	Telm 5	8.6
PRI	59444	4669	Telm 5	11.3
PRI	59444	4669	Telm 5	9.2
PRI	59444	4669	Telm 5	8.3
PRI	59444	4669	Telm 5	9
PRI	59444	4669	Telm 5	8.3
PRI	59444	4669	Telm 5	9
PRI	59444	4669	Telm 5	7.9
PRI	59444	4669	Telm 5	9.8
PRI	59444	4669	Telm 5	9.7
PRI	59444	4669	Telm 5	7
PRI	59444	4669	Telm 5	9.2
PRI	59444	4669	Telm 5	7.6
PRI	59444	4669	Telm 5	10.7
PRI	59444	4669	Telm 5	9.9
PRI	59444	4669	Telm 5	20	complete
PRI	59444	4669	Telm 5	10.5	complete
PRI	59444	4669	Telm 5	11.2	complete
PRI	59444	4669	Telm 5	17.5	complete
PRI	59444	4669	Telm 5	11	complete
PRI	59444	4669	Telm 5	15.3	complete
PRI	59444	4669	Telm 5	9.6	complete
PRI	59444	4669	Telm 5	9.5
PRI	59444	4669	Telm 5	15	complete
PRI	59444	4669	Telm 5	9.6	complete
PRI	59444	4669	Telm 5	12.2	complete
PRI	59444	4669	Telm 5	12.1	complete
PRI	59444	4669	Telm 5	10.7	complete
PRI	59444	4669	Telm 5	9	complete
PRI	59444	4669	Telm 5	15	complete
PRI	59444	4669	Telm 5	7.8	complete
PRI	59444	4669	Telm 5	9.2	complete
PRI	59444	4669	Telm 5	9.6	complete
PRI	59444	4669	Telm 5	9.3	complete
PRI	59444	4669	Telm 5	8
PRI	59444	4669	Telm 5	7
PRI	59449	4215	Telm 5	26.5
PRI	59449	4215	Telm 5	22.9
PRI	59449	4215	Telm 5	37.5
PRI	59449	4215	Telm 5	29.5
PRI	59449	4215	Telm 5	27.4
PRI	59449	4215	Telm 5	24
PRI	59449	4215	Telm 5	23.7
PRI	59449	4215	Telm 5	20.8
PRI	59449	4215	Telm 5	20.3
PRI	59449	4215	Telm 5	17
PRI	59449	4215	Telm 5	28
PRI	59449	4215	Telm 5	16
PRI	59449	4215	Telm 5	16.4
PRI	59449	4215	Telm 5
PRI	59449	4215	Telm 5	22
PRI	59449	4215	Telm 5	18	complete
PRI	58974	4699	Telm 5	15.6
PRI	58974	4699	Telm 5	20.6
PRI	58974	4699	Telm 5	24
PRI	58974	4699	Telm 5	24
PRI	58974	4699	Telm 5	20.9
PRI	58974	4699	Telm 5	9.8
PRI	58974	4699	Telm 5	9.1
PRI	58974	4699	Telm 5	19.6	complete
PRI	59616	4267	Telm 5	22.9
PRI	59616	4267	Telm 5	16.3
PRI	59515	4670	Telm 5	37
PRI	56852	4670	Telm 5	18.4
PRI	56852	4670	Telm 5	30.5
PRI	56852	4670	Telm 5	24
PRI	56852	4670	Telm 5	9.9
PRI	56852	4670	Telm 5	13.3
PRI	56852	4670	Telm 5	11.2
PRI	56852	4670	Telm 5	12.87
PRI	56852	4670	Telm 5	6.6
PRI	56852	4670	Telm 5	11.9
PRI	56852	4670	Telm 5	8
PRI	56852	4670	Telm 5	7.5
PRI	56852	4670	Telm 5	12.3
PRI	56852	4670	Telm 5	11.2
PRI	65177	4285	Telm 5	5.8
PRI	65177	4285	Telm 5	5.5
PRI	65177	4285	Telm 5	3.5
PRI	65177	4285	Telm 5	6
PRI	65177	4285	Telm 5	51
PRI	58968	4698	Telm 5	30.7
PRI	58968	4698	Telm 5	27.7
PRI	58968	4698	Telm 5	27.1
PRI	62992	4669	Telm 5	60
PRI	62992	4669	Telm 5	43.2
PRI	62992	4669	Telm 5	32.5
PRI	62992	4669	Telm 5	31.7
PRI	59370	4234	Telm 5	28
PRI	59370	4234	Telm 5	38.7
PRI	59370	4234	Telm 5	50.4
PRI	59370	4234	Telm 5	43.2
PRI	59370	4234	Telm 5	39
PRI	59370	4234	Telm 5	39.3
PRI	59370	4234	Telm 5	24.8
PRI	59370	4234	Telm 5	32.3
PRI	59370	4234	Telm 5	36.7
PRI	59370	4234	Telm 5	39.3
PRI	59370	4234	Telm 5	29.3
PRI	59370	4234	Telm 5	32.2
PRI	59370	4234	Telm 5	30.5
PRI	59370	4234	Telm 5	22.75
PRI	59370	4234	Telm 5	23.5
PRI	59370	4234	Telm 5	25.7
PRI	59370	4234	Telm 5	24.4
PRI	59370	4234	Telm 5	26.2
PRI	59370	4234	Telm 5	20
PRI	59370	4234	Telm 5	18.9
PRI	59370	4234	Telm 5	18.9
PRI	59370	4234	Telm 5	15.3
PRI	59370	4234	Telm 5	17.5
PRI	59370	4234	Telm 5	17
PRI	59370	4234	Telm 5	19.7
PRI	59370	4234	Telm 5	13.7
PRI	59370	4234	Telm 5	14	complete
PRI	59370	4234	Telm 5	19	incomplete
PRI	59370	4234	Telm 5	13.6	incomplete
PRI	59370	4234	Telm 5	15.8	incomplete
PRI	59370	4234	Telm 5	10.4	complete
PRI	60043	4333	Telm 5	38.4
PRI	60043	4333	Telm 5	36.2
PRI	60043	4333	Telm 5	27.3
PRI	60043	4333	Telm 5	12.5
PRI	60043	4333	Telm 5	24
PRI	60043	4333	Telm 5	17.8
PRI	60043	4333	Telm 5	17.2
PRI	60043	4333	Telm 5	23.8
PRI	60043	4333	Telm 5	18.1
PRI	60043	4333	Telm 5	15.3
PRI	60043	4333	Telm 5	21.5
PRI	60043	4333	Telm 5	22
PRI	60043	4333	Telm 5	16.5
PRI	60043	4333	Telm 5	22.6
PRI	60043	4333	Telm 5	16.7
PRI	60043	4333	Telm 5	12.9
PRI	60043	4333	Telm 5	12.6
PRI	60043	4333	Telm 5	12.9
PRI	60043	4333	Telm 5	16
PRI	60043	4333	Telm 5	13
PRI	60043	4333	Telm 5	13.6
PRI	59208	4199	Telm 5	10.3
PRI	59208	4199	Telm 5	12
PRI	59208	4199	Telm 5	8
PRI	59208	4199	Telm 5	34.1
PRI	59208	4199	Telm 5	30.4
PRI	59208	4199	Telm 5	38.6
PRI	59208	4199	Telm 5	20
PRI	59208	4199	Telm 5	26.2
PRI	59208	4199	Telm 5	20.25
PRI	59208	4199	Telm 5	20.1
PRI	59208	4199	Telm 5	20.04
PRI	59497	4670	Telm 5	24.2
PRI	59497	4670	Telm 5	18.7
PRI	59497	4670	Telm 5	17.4
PRI	59497	4670	Telm 5	18.8
PRI	59497	4670	Telm 5	27.7
PRI	59497	4670	Telm 5	18
PRI	59497	4670	Telm 5	15.3
PRI	60039	4334	Telm 5	23.7
PRI	60039	4334	Telm 5	21.8
PRI	60039	4334	Telm 5	17.5
PRI	60039	4334	Telm 5	19.9
PRI	59841	4258	Telm 5	17.6
PRI	59841	4258	Telm 5	23.2
PRI	59841	4258	Telm 5	14.5
PRI	59879	4259	Telm 5	22.2
PRI	59879	4259	Telm 5	10.7
PRI	63403	4668	Telm 5	33.8
PRI	63403	4668	Telm 5	14.9
PRI	63403	4668	Telm 5	7.3
PRI	65234	4669	Telm 5	17.3
PRI	65234	4669	Telm 5	20.1
PRI	65234	4669	Telm 5	26.2
PRI	65234	4669	Telm 5	9.9
PRI	65234	4669	Telm 5	14.2
PRI	65234	4669	Telm 5	15.7
PRI	65234	4669	Telm 5	16.7
PRI	65234	4669	Telm 5	15.9
PRI	65234	4669	Telm 5	8.2
PRI	65234	4669	Telm 5	11.2
PRI	65234	4669	Telm 5	10.1
PRI	65234	4669	Telm 5	10.3
PRI	65234	4669	Telm 5	9.9	complete
PRI	59709	4236	Telm 5	28.5
PRI	59709	4236	Telm 5	18.7
PRI	59709	4236	Telm 5	21.3
PRI	59709	4236	Telm 5	25
PRI	62950	4670	Telm 5	26.1
PRI	65394	4315	Telm 5	14.6
PRI	59228	5226	Telm 5	14.8
PRI	59228	5226	Telm 5	21
PRI	59228	5226	Telm 5	13.7	complete
PRI	65248	4308	Telm 5	20.2
PRI	65248	4308	Telm 5	29
PRI	65248	4308	Telm 5	3.8	complete
PRI	65248	4308	Telm 5	3.8	complete
PRI	65248	4308	Telm 5	7	complete
PRI	65248	4308	Telm 5	6.1	complete
PRI	65248	4308	Telm 5	6.2
PRI	65248	4308	Telm 5	6.5
PRI	65248	4308	Telm 5	6.7
PRI	65248	4308	Telm 5	6.4
PRI	65248	4308	Telm 5	6.5
PRI	65248	4308	Telm 5	7.2
PRI	65248	4308	Telm 5	7.8
PRI	65248	4308	Telm 5	6.6
PRI	65248	4308	Telm 5	7.2
PRI	65248	4308	Telm 5	7.4
PRI	65248	4308	Telm 5	6.3
PRI	65248	4308	Telm 5	7.6
PRI	65248	4308	Telm 5	7.2
PRI	65248	4308	Telm 5	6.6
PRI	65248	4308	Telm 5	6.5
PRI	65248	4308	Telm 5	6.8
PRI	65248	4308	Telm 5	6.5
PRI	65248	4308	Telm 5	6.5
PRI	65248	4308	Telm 5	7.2
PRI	65248	4308	Telm 5	7.65
PRI	65248	4308	Telm 5	6.1
PRI	65248	4308	Telm 5	5.9
PRI	65248	4308	Telm 5	5.7
PRI	65248	4308	Telm 5	5.7
PRI	65248	4308	Telm 5	5.3
PRI	65248	4308	Telm 5	5.6
PRI	65248	4308	Telm 5	5.9
PRI	65248	4308	Telm 5	6.3
PRI	65248	4308	Telm 5	6.3
PRI	65248	4308	Telm 5	5.1
PRI	65248	4308	Telm 5	5	complete
PRI	65294	4308	Telm 5	12.2
PRI	65294	4308	Telm 5	8.3
PRI	65294	4308	Telm 5	9
PRI	65294	4308	Telm 5	6.7
PRI	65294	4308	Telm 5	6.8
PRI	65294	4308	Telm 5	6.7
PRI	65294	4308	Telm 5	5.6	complete
PRI	65294	4308	Telm 5	5.7
PRI	65294	4308	Telm 5	7
PRI	65294	4308	Telm 5	6.5
PRI	65228	4669	Telm 5	16.3
PRI	65228	4669	Telm 5	20.8
PRI	65228	4669	Telm 5	17.7
PRI	65228	4669	Telm 5	24.2
PRI	65228	4669	Telm 5	18.9
PRI	65228	4669	Telm 5	12.8
PRI	65228	4669	Telm 5	16.1
PRI	65228	4669	Telm 5	15.4
PRI	65228	4669	Telm 5	14.3
PRI	65228	4669	Telm 5	13.5
PRI	65228	4669	Telm 5	13.7
PRI	65228	4669	Telm 5	9.1
PRI	59392	4208	Telm 5	22
PRI	59392	4208	Telm 5	24.9
PRI	59392	4208	Telm 5	34.7
PRI	59392	4208	Telm 5	26
PRI	59392	4208	Telm 5	17.2
PRI	59392	4208	Telm 5	15
PRI	59392	4208	Telm 5	22
PRI	59392	4208	Telm 5	24.9
PRI	59392	4208	Telm 5	34.7
PRI	59392	4208	Telm 5	26
PRI	59392	4208	Telm 5	17.2
PRI	59392	4208	Telm 5	15
PRI	63201	4669	Telm 5	13
PRI	63201	4669	Telm 5	5.8
PRI	63201	4669	Telm 5	5.8
PRI	60343	4225	Telm 5	12.7
PRI	60343	4225	Telm 5	5
PRI	60343	4225	Telm 5	11
PRI	60343	4225	Telm 5	7.9
PRI	60343	4225	Telm 5	5.5
PRI	60343	4225	Telm 5	6.6	complete
PRI	59259	4298	Telm 5	24.3
PRI	59259	4298	Telm 5	24.6
PRI	59259	4298	Telm 5	24.5
PRI	59259	4298	Telm 5	22.5
PRI	59259	4298	Telm 5	27.5
PRI	59259	4298	Telm 5	25.9
PRI	59766	4244	Telm 5	20.5
PRI	59766	4244	Telm 5	16.3
PRI	59766	4244	Telm 5	20.6
PRI	59766	4244	Telm 5	25
PRI	59766	4244	Telm 5	18.4
PRI	59766	4244	Telm 5	22
PRI	59766	4244	Telm 5	21.6
PRI	59766	4244	Telm 5	24.5
PRI	59766	4244	Telm 5	22.6
PRI	59766	4244	Telm 5	21.3
PRI	59766	4244	Telm 5	20
PRI	59766	4244	Telm 5	22.6
PRI	59766	4244	Telm 5	20
PRI	59766	4244	Telm 5	19.9
PRI	59570	4206	Telm 5	29
PRI	59570	4206	Telm 5	32.9
PRI	59570	4206	Telm 5	23
PRI	59570	4206	Telm 5	17.2
PRI	59570	4206	Telm 5	21.4	incomplete
PRI	59570	4206	Telm 5	23.1
PRI	59570	4206	Telm 5	6.3
PRI	59570	4206	Telm 5	19.5
PRI	59570	4206	Telm 5	14.7
PRI	59570	4206	Telm 5	17.5
PRI	59570	4206	Telm 5	15.2	incomplete
PRI	59570	4206	Telm 5	17.1	complete
PRI	63100	4206	Telm 5	21
PRI	63100	4206	Telm 5	47
PRI	63100	4206	Telm 5	26.3
PRI	63100	4206	Telm 5	18.6
PRI	63100	4206	Telm 5	24.2
PRI	63100	4206	Telm 5	19.6
PRI	63100	4206	Telm 5	16.1
PRI	63100	4206	Telm 5	24
PRI	63100	4206	Telm 5	20
PRI	63100	4206	Telm 5	16
PRI	63100	4206	Telm 5	15.6
PRI	63100	4206	Telm 5	20.9
PRI	63100	4206	Telm 5	15.3
PRI	63100	4206	Telm 5	15.6	complete
PRI	63100	4206	Telm 5	15	incomplete
PRI	63100	4206	Telm 5	9
PRI	63100	4206	Telm 5	13	complete
PRI	63100	4206	Telm 5	11	incomplete
PRI	63100	4206	Telm 5	11
PRI	63100	4206	Telm 5	10
PRI	63100	4206	Telm 5	11
PRI	63100	4206	Telm 5	13
PRI	63100	4206	Telm 5	9
PRI	63100	4206	Telm 5	10
PRI	63100	4206	Telm 5	11.3
PRI	63100	4206	Telm 5	10.6
PRI	63100	4206	Telm 5	7.9
PRI	63100	4206	Telm 5	11.2
PRI	63100	4206	Telm 5	10
PRI	63100	4206	Telm 5	11.5
PRI	63100	4206	Telm 5	7.5
PRI	63100	4206	Telm 5	8.5
PRI	59422	4208	Telm 5	23.4
PRI	63567	4244	Telm 5	15.6
PRI	59910	4283	Telm 5	25
PRI	59910	4283	Telm 5	23.7
PRI	59910	4283	Telm 5	20.4
PRI	59377	4234	Telm 5	22.5
PRI	59377	4234	Telm 5	24
PRI	59377	4234	Telm 5	21.4	complete
PRI	58988	4700	Telm 5	21
PRI	58988	4700	Telm 5	20.6
PRI	58988	4700	Telm 5	15.7
PRI	60232	4669	Telm 5	10.4
PRI	60232	4669	Telm 5	6	complete
PRI	60232	4669	Telm 5	5.5	complete
PRI	62807	4670	Telm 5	9.7
PRI	62807	4670	Telm 5	12.7
PRI	62807	4670	Telm 5	12
PRI	62807	4670	Telm 5	12.6
PRI	62888	4670	Telm 5	29
PRI	62888	4670	Telm 5	30
UF	YF161 00-10	YF161 00-10	Telm 5	21
UF	YF161 00-10	YF161 00-10	Telm 5	18.7
UF	YF161 00-10	YF161 00-10	Telm 5	22.9
UF	YF161 00-10	YF161 00-10	Telm 5	21.4
UF	YF161 00-10	YF161 00-10	Telm 5	24.6
UF	YF161 00-10	YF161 00-10	Telm 5	20.5
UF	YF161 00-10	YF161 00-10	Telm 5	21.5
UF	YF161 00-10	YF161 00-10	Telm 5	33.14
UF	YF161 00-10	YF161 00-10	Telm 5	12.3
UF	YF161 00-10	YF161 00-10	Telm 5	14.8
UF	YF161 00-10	YF161 00-10	Telm 5	15
UF	YF161 00-10	YF161 00-10	Telm 5	15.1
UF	YF161 00-10	YF161 00-10	Telm 5	41
UF	YF161 00-10	YF161 00-10	Telm 5	27
UF	YF161 00-10	YF161 00-10	Telm 5	19.38
UF	YF161 00-10	YF161 00-10	Telm 5	12.5	complete
UF	YF161 00-10	YF161 00-10	Telm 5	10	complete
UF	YF161 00-10	YF161 00-10	Telm 5	10.8
UF	YF161 00-10	YF161 00-10	Telm 5	11
UF	YF161 00-10	YF161 00-10	Telm 5	8
UF	YF161 00-10	YF161 00-10	Telm 5	12
UF	YF161 00-10	YF161 00-10	Telm 5	12.5
UF	YF161 00-10	YF161 00-10	Telm 5	10.2
UF	YF161 00-10	YF161 00-10	Telm 5	7.8
UF	YF161 00-10	YF161 00-10	Telm 5	11.7
UF	YF161 00-10	YF161 00-10	Telm 5	9.3
UF	YF161 00-10	YF161 00-10	Telm 5	9.9
UF	YF161 00-10	YF161 00-10	Telm 5	11.4
UF	YF161 00-10	YF161 00-10	Telm 5	20
UF	YF161 00-10	YF161 00-10	Telm 5	17
UF	YF161 00-10	YF161 00-10	Telm 5	20
UF	YF161 00-10	YF161 00-10	Telm 5	16
UF	YF161 00-10	YF161 00-10	Telm 5	15
UF	YF161 00-10	YF161 00-10	Telm 5	14
UF	YF161 00-10	YF161 00-10	Telm 5	15
UF	YF161 00-10	YF161 00-10	Telm 5	15
UF	YF161 00-10	YF161 00-10	Telm 5	12
UF	YF161 00-10	YF161 00-10	Telm 5	15
UF	YF161 00-10	YF161 00-10	Telm 5	17
UF	YF161 00-10	YF161 00-10	Telm 5	12
UF	YF161 00-10	YF161 00-10	Telm 5	14
UF	YF161 00-10	YF161 00-10	Telm 5	15
UF	YF161 00-10	YF161 00-10	Telm 5	17
UF	YF161 00-10	YF161 00-10	Telm 5	15
UF	YF161 00-10	YF161 00-10	Telm 5	13
UF	YF154	YF154	Telm 5	18.7	complete
UF	YF154	YF154	Telm 5	17.4	complete
UF	YF154	YF154	Telm 5	22.5
UF	YF154	YF154	Telm 5	22.8
UF	YF154	YF154	Telm 5	27.3
UF	YF154	YF154	Telm 5	21.5
UF	YF154	YF154	Telm 5	30
UF	YF154	YF154	Telm 5	32.5
UF	YF154	YF154	Telm 5	28.5
UF	YF154	YF154	Telm 5	26
UF	YF154	YF154	Telm 5	18
UF	YF154	YF154	Telm 5	15
UF	YF154	YF154	Telm 5	18.4
UF	YF154	YF154	Telm 5	19.5
UF	YF154	YF154	Telm 5	12.5
UF	YF154	YF154	Telm 5	16.4
UF	YF154	YF154	Telm 5	13.9
UF	YF154	YF154	Telm 5	13.2
UF	YF154	YF154	Telm 5	9.8
UF	YF154	YF154	Telm 5	27.8
UF	YF154	YF154	Telm 5	23.5
UF	YF154	YF154	Telm 5	21
UF	YF154	YF154	Telm 5	15
UF	YF154	YF154	Telm 5	14
UF	YF154	YF154	Telm 5	17
UF	YF154	YF154	Telm 5	23
UF	YF154	YF154	Telm 5	16
UF	YF154	YF154	Telm 5	17
UF	YF154	YF154	Telm 5	30
UF	YF154	YF154	Telm 5	23
UF	YF154	YF154	Telm 5	30
UF	YF154	YF154	Telm 5	33
UF	YF154	YF154	Telm 5	22
UF	YF154	YF154	Telm 5	22
UF	YF154	YF154	Telm 5	16
UF	YF154	YF154	Telm 5	18
UF	YF154	YF154	Telm 5	13
UF	YF154	YF154	Telm 5	17
UF	YF154	YF154	Telm 5	28
UF	YF154	YF154	Telm 5	36
UF	YF154	YF154	Telm 5	27
UF	YF154	YF154	Telm 5	18
UF	YF154	YF154	Telm 5	17
UF	YF001 00-001	YF001 00-001	Telm 5	8.8
UF	YF001 00-001	YF001 00-001	Telm 5	12.9
UF	YF001 00-001	YF001 00-001	Telm 5	16.4
UF	YF001 00-001	YF001 00-001	Telm 5	12.9
UF	YF001 00-001	YF001 00-001	Telm 5	15
UF	YF001 00-001	YF001 00-001	Telm 5	12
UF	YF001 00-001	YF001 00-001	Telm 5	17
UF	YF001 00-001	YF001 00-001	Telm 5	25
UF	YF001 00-001	YF001 00-001	Telm 5	25
UF	YF001 00-001	YF001 00-001	Telm 5	22
UF	YF001 00-001	YF001 00-001	Telm 5	21
UF	YF001 00-001	YF001 00-001	Telm 5	20.8
UF	YF001 00-001	YF001 00-001	Telm 5	15.4
UF	YF001 00-001	YF001 00-001	Telm 5	14.7
UF	YF001 00-001	YF001 00-001	Telm 5	7.8
UF	YF001 00-001	YF001 00-001	Telm 5	14
UF	YF001 00-001	YF001 00-001	Telm 5	18.3
UF	YF001 00-001	YF001 00-001	Telm 5	15.4
UF	YF001 00-001	YF001 00-001	Telm 5	10.2
UF	YF001 00-001	YF001 00-001	Telm 5	28
UF	YF001 00-001	YF001 00-001	Telm 5	26
UF	YF001 00-001	YF001 00-001	Telm 5	15.5
UF	YF001 00-001	YF001 00-001	Telm 5	13.5
UF	YF001 00-001	YF001 00-001	Telm 5	14.4
UF	YF001 00-001	YF001 00-001	Telm 5	14.7
UF	YF001 00-001	YF001 00-001	Telm 5	13.2
UF	YF001 00-001	YF001 00-001	Telm 5	15.4
UF	YF001 00-001	YF001 00-001	Telm 5	20
UF	YF001 00-001	YF001 00-001	Telm 5	24
UF	YF001 00-001	YF001 00-001	Telm 5	15.5
UF	YF001 00-001	YF001 00-001	Telm 5	14.3
UF	YF001 00-001	YF001 00-001	Telm 5	13.9
UF	YF001 00-001	YF001 00-001	Telm 5	12
UF	YF001 00-001	YF001 00-001	Telm 5	14
UF	YF001 00-001	YF001 00-001	Telm 5	15.7
UF	YF001 00-001	YF001 00-001	Telm 5	16.2
UF	YF001 00-001	YF001 00-001	Telm 5	18.3
UF	YF001 00-001	YF001 00-001	Telm 5	17.3
UF	YF001 00-001	YF001 00-001	Telm 5	13.8
UF	YF001 00-001	YF001 00-001	Telm 5	24.8
UF	YF001 00-001	YF001 00-001	Telm 5	29.3
UF	YF001 00-001	YF001 00-001	Telm 5	34
UF	YF001 00-001	YF001 00-001	Telm 5	16
UF	YF001 00-001	YF001 00-001	Telm 5	19
UF	YF001 00-001	YF001 00-001	Telm 5	17.5
UF	YF001 00-001	YF001 00-001	Telm 5	25
UF	YF001 00-001	YF001 00-001	Telm 5	22
UF	YF001 00-001	YF001 00-001	Telm 5	18
UF	YF001 00-001	YF001 00-001	Telm 5	17
UF	YF001 00-001	YF001 00-001	Telm 5	19
UF	YF001 00-001	YF001 00-001	Telm 5	18
UF	YF001 00-001	YF001 00-001	Telm 5	14
UF	YF001 00-001	YF001 00-001	Telm 5	10
UF	YF001 00-001	YF001 00-001	Telm 5	11
UF	YF001 00-001	YF001 00-001	Telm 5	15
UF	YF001 00-001	YF001 00-001	Telm 5	13
UF	YF001 00-001	YF001 00-001	Telm 5	14
UF	YF001 00-001	YF001 00-001	Telm 5	10
UF	YF001 00-001	YF001 00-001	Telm 5	21
UF	YF001 00-001	YF001 00-001	Telm 5	11.5
UF	YF001 00-001	YF001 00-001	Telm 5	13.2
UF	YF001 00-001	YF001 00-001	Telm 5	12.7
UF	YF001 00-001	YF001 00-001	Telm 5	15.6
UF	YF001 00-001	YF001 00-001	Telm 5	14.7
UF	YF001 00-001	YF001 00-001	Telm 5	15.6
UF	YF001 00-001	YF001 00-001	Telm 5	24
UF	YF001 00-001	YF001 00-001	Telm 5	10
UF	YF001 00-001	YF001 00-001	Telm 5	10.4
UF	YF001 00-001	YF001 00-001	Telm 5	6
UF	YF001 00-001	YF001 00-001	Telm 5	19
UF	YF001 00-001	YF001 00-001	Telm 5	23
UF	YF001 00-001	YF001 00-001	Telm 5	16
UF	YF001 00-001	YF001 00-001	Telm 5	22.4
UF	YF001 00-001	YF001 00-001	Telm 5	23
UF	YF001 00-001	YF001 00-001	Telm 5	22.6
UF	YF001 00-001	YF001 00-001	Telm 5	19.9
UF	YF001 00-001	YF001 00-001	Telm 5	23.7
UF	YF001 00-001	YF001 00-001	Telm 5	19.7
UF	YF001 00-001	YF001 00-001	Telm 5	15.8
UF	YF001 00-001	YF001 00-001	Telm 5	13.4
UF	YF001 00-001	YF001 00-001	Telm 5	14.4
UF	YF001 00-001	YF001 00-001	Telm 5	18.6
UF	YF001 00-001	YF001 00-001	Telm 5	18.3
UF	YF001 00-001	YF001 00-001	Telm 5	17.8
UF	YF001 00-001	YF001 00-001	Telm 5	19.33
UF	YF001 00-001	YF001 00-001	Telm 5	15.3
UF	YF001 00-001	YF001 00-001	Telm 5	12.6
UF	YF001 00-001	YF001 00-001	Telm 5	13.8
UF	YF001 00-001	YF001 00-001	Telm 5	15.4
UF	YF001 00-001	YF001 00-001	Telm 5	21.9
UF	YF001 00-001	YF001 00-001	Telm 5	13.9
UF	YF001 00-001	YF001 00-001	Telm 5	16
UF	YF001 00-001	YF001 00-001	Telm 5	12.8
UF	YF001 00-001	YF001 00-001	Telm 5	18.3
UF	YF001 00-001	YF001 00-001	Telm 5	18.3
UF	YF001 00-001	YF001 00-001	Telm 5	16.8
UF	YF001 00-001	YF001 00-001	Telm 5	13.4
UF	YF001 00-001	YF001 00-001	Telm 5	17.1
UF	YF001 00-001	YF001 00-001	Telm 5	14.6
UF	YF001 00-001	YF001 00-001	Telm 5	13.6
UF	YF001 00-001	YF001 00-001	Telm 5	14.4
UF	YF001 00-001	YF001 00-001	Telm 5	15
UF	YF001 00-001	YF001 00-001	Telm 5	14.9
UF	YF001 00-001	YF001 00-001	Telm 5	14.2
UF	YF001 00-001	YF001 00-001	Telm 5	16.7
UF	YF001 00-001	YF001 00-001	Telm 5	14.6
UF	YF001 00-001	YF001 00-001	Telm 5	18.3
UF	YF001 00-001	YF001 00-001	Telm 5	17.6
UF	YF001 00-001	YF001 00-001	Telm 5	14.2
UF	YF001 00-001	YF001 00-001	Telm 5	19.8
UF	YF001 00-001	YF001 00-001	Telm 5	15.2
UF	YF001 00-001	YF001 00-001	Telm 5	16
UF	YF001 00-001	YF001 00-001	Telm 5	18.1
UF	YF001 00-001	YF001 00-001	Telm 5	13.6
UF	YF001 00-001	YF001 00-001	Telm 5	18.7
UF	YF001 00-001	YF001 00-001	Telm 5	14.4
UF	YF001 00-001	YF001 00-001	Telm 5	12.7
UF	YF001 00-001	YF001 00-001	Telm 5	13.5
UF	YF001 00-001	YF001 00-001	Telm 5	18.5
UF	YF001 00-001	YF001 00-001	Telm 5	15.8
UF	YF001 00-001	YF001 00-001	Telm 5	17.9
UF	YF001 00-001	YF001 00-001	Telm 5	13.8
UF	YF001 00-001	YF001 00-001	Telm 5	15
UF	YF001 00-001	YF001 00-001	Telm 5	19.5
UF	YF001 00-001	YF001 00-001	Telm 5	11.3
UF	YF001 00-001	YF001 00-001	Telm 5	10.9
UF	YF001 00-001	YF001 00-001	Telm 5	12
UF	YF001 00-001	YF001 00-001	Telm 5	9.5
UF	YF001 00-001	YF001 00-001	Telm 5	10.5
UF	YF001 00-001	YF001 00-001	Telm 5	10.2
UF	YF001 00-001	YF001 00-001	Telm 5	11
UF	YF001 00-001	YF001 00-001	Telm 5	9.5
UF	YF001 00-001	YF001 00-001	Telm 5	9.5
UF	YF001 00-001	YF001 00-001	Telm 5	10
UF	YF001 00-001	YF001 00-001	Telm 5	8.8
UF	YF001 00-001	YF001 00-001	Telm 5	10.2
UF	YF001 00-001	YF001 00-001	Telm 5	6.9
UF	YF001 00-001	YF001 00-001	Telm 5	11.2
UF	YF001 00-001	YF001 00-001	Telm 5	10.7
UF	YF001 00-001	YF001 00-001	Telm 5	8.6
UF	YF001 00-001	YF001 00-001	Telm 5	9.8
UF	YF001 00-001	YF001 00-001	Telm 5	11.5
UF	YF001 00-001	YF001 00-001	Telm 5	8.4
UF	YF001 00-001	YF001 00-001	Telm 5	11.7
UF	YF001 00-001	YF001 00-001	Telm 5	7.3
UF	YF001 00-001	YF001 00-001	Telm 5	13.2
UF	YF001 00-001	YF001 00-001	Telm 5	11.4
UF	YF001 00-001	YF001 00-001	Telm 5	8.5
UF	YF001 00-001	YF001 00-001	Telm 5	9.2
UF	YF001 00-001	YF001 00-001	Telm 5	10.8
UF	YF001 00-001	YF001 00-001	Telm 5	10.7
UF	YF001 00-001	YF001 00-001	Telm 5	11.3
UF	YF001 00-001	YF001 00-001	Telm 5	12
UF	YF001 00-001	YF001 00-001	Telm 5	12.4
UF	YF001 00-001	YF001 00-001	Telm 5	8.8
UF	YF001 00-001	YF001 00-001	Telm 5	10
UF	YF001 00-001	YF001 00-001	Telm 5	10.5
UF	YF001 00-001	YF001 00-001	Telm 5	10
UF	YF001 00-001	YF001 00-001	Telm 5	9.6	complete
UF	YF001 00-001	YF001 00-001	Telm 5	11
UF	YF001 00-001	YF001 00-001	Telm 5	10
UF	YF001 00-001	YF001 00-001	Telm 5	9
UF	YF001 00-001	YF001 00-001	Telm 5	10.4
UF	YF001 00-001	YF001 00-001	Telm 5	13.9
UF	YF001 00-001	YF001 00-001	Telm 5	17.9	complete
UF	YF001 00-001	YF001 00-001	Telm 5	8.6	complete
UF	YF001 00-001	YF001 00-001	Telm 5	12.8	complete
UF	YF001 00-001	YF001 00-001	Telm 5	9.8	complete
UF	YF001 00-001	YF001 00-001	Telm 5	10	complete
UF	YF001 00-001	YF001 00-001	Telm 5	9	complete
UF	YF001 00-001	YF001 00-001	Telm 5	15	complete
UF	YF001 00-001	YF001 00-001	Telm 5	15.8
UF	YF001 00-001	YF001 00-001	Telm 5	13.01
UF	YF001 00-001	YF001 00-001	Telm 5	15.3
UF	YF001 00-001	YF001 00-001	Telm 5	10
UF	YF001 00-001	YF001 00-001	Telm 5	16.2
UF	YF001 00-001	YF001 00-001	Telm 5	15.3
UF	YF001 00-001	YF001 00-001	Telm 5	13.5
UF	YF001 00-001	YF001 00-001	Telm 5	9.5
UF	YF001 00-001	YF001 00-001	Telm 5	14
UF	YF001 00-001	YF001 00-001	Telm 5	17
UF	YF001 00-001	YF001 00-001	Telm 5	15
UF	YF001 00-001	YF001 00-001	Telm 5	17.3
UF	YF001 00-001	YF001 00-001	Telm 5	19.7
UF	YF001 00-001	YF001 00-001	Telm 5	11.5
UF	YF001 00-001	YF001 00-001	Telm 5	20
UF	YF001 00-001	YF001 00-001	Telm 5	18
UF	YF001 00-001	YF001 00-001	Telm 5	12.8
UF	YF001 00-001	YF001 00-001	Telm 5	15
UF	YF001 00-001	YF001 00-001	Telm 5	8.3
UF	YF001 00-001	YF001 00-001	Telm 5	12
UF	YF001 00-001	YF001 00-001	Telm 5	9
UF	YF001 00-001	YF001 00-001	Telm 5	12
UF	YF001 00-001	YF001 00-001	Telm 5	19
UF	YF001 00-001	YF001 00-001	Telm 5	13.5
UF	YF001 00-001	YF001 00-001	Telm 5	13.5
UF	YF078 01-90	YF078 01-90	Telm 5	13.9	complete
UF	YF078 01-90	YF078 01-90	Telm 5	14	complete
UF	YF078 01-90	YF078 01-90	Telm 5	18	incomplete
UF	YF078 01-90	YF078 01-90	Telm 5	12	complete
UF	YF078 01-90	YF078 01-90	Telm 5	12	complete
UF	YF078 01-90	YF078 01-90	Telm 5	11
UF	YF078 01-90	YF078 01-90	Telm 5	15
UF	YF078 01-90	YF078 01-90	Telm 5	10
UF	YF078 01-90	YF078 01-90	Telm 5	9
UF	YF078 01-90	YF078 01-90	Telm 5	8
UF	YF078 01-90	YF078 01-90	Telm 5	17
UF	YF078 01-90	YF078 01-90	Telm 5	20
UF	YF078 01-90	YF078 01-90	Telm 5	14
UF	YF078 01-90	YF078 01-90	Telm 5	14
UF	YF078 01-90	YF078 01-90	Telm 5	13
UF	YF078 01-90	YF078 01-90	Telm 5	16
UF	YF078 01-90	YF078 01-90	Telm 5	12
UF	YF078 01-90	YF078 01-90	Telm 5	14
UF	YF078 01-90	YF078 01-90	Telm 5	15
UF	YF078 01-90	YF078 01-90	Telm 5	20
UF	YF078 01-90	YF078 01-90	Telm 5	16
UF	YF078 01-90	YF078 01-90	Telm 5	21
UF	YF078 01-90	YF078 01-90	Telm 5	20
UF	YF078 01-90	YF078 01-90	Telm 5	20
UF	YF078 01-90	YF078 01-90	Telm 5	20
UF	YF078 01-90	YF078 01-90	Telm 5	22
UF	YF078 01-90	YF078 01-90	Telm 5	15
UF	YF078 01-90	YF078 01-90	Telm 5	17
UF	YF078 01-90	YF078 01-90	Telm 5	15
UF	YF078 01-90	YF078 01-90	Telm 5	10
UF	YF078 01-90	YF078 01-90	Telm 5	10
UF	YF078 01-90	YF078 01-90	Telm 5	14
UF	YF078 01-90	YF078 01-90	Telm 5	13
UF	YF078 01-90	YF078 01-90	Telm 5	14
UF	YF078 01-90	YF078 01-90	Telm 5	11
UF	YF078 01-90	YF078 01-90	Telm 5	10
UF	YF078 01-90	YF078 01-90	Telm 5	17
UF	YF078 01-90	YF078 01-90	Telm 5	16
UF	YF078 01-90	YF078 01-90	Telm 5	11
UF	YF078 01-90	YF078 01-90	Telm 5	15
UF	YF078 01-90	YF078 01-90	Telm 5	12
UF	YF078 01-90	YF078 01-90	Telm 5	16
UF	YF078 01-90	YF078 01-90	Telm 5	17
UF	YF078 01-90	YF078 01-90	Telm 5	21
UF	YF078 01-90	YF078 01-90	Telm 5	23
UF	YF078 01-90	YF078 01-90	Telm 5	16
UF	YF078 01-90	YF078 01-90	Telm 5	18
UF	YF078 01-90	YF078 01-90	Telm 5	18
UF	YF078 01-90	YF078 01-90	Telm 5	17
UF	YF078 01-90	YF078 01-90	Telm 5	19
UF	YF078 01-90	YF078 01-90	Telm 5	17
UF	YF078 01-90	YF078 01-90	Telm 5	16
UF	YF078 01-90	YF078 01-90	Telm 5	16
UF	YF078 01-90	YF078 01-90	Telm 5	14
UF	YF078 01-90	YF078 01-90	Telm 5	16
UF	YF 8 01-093	YF 8 01-093	Telm 5	21
UF	YF 8 01-093	YF 8 01-093	Telm 5	21
UF	YF 8 01-093	YF 8 01-093	Telm 5	20
UF	YF 8 01-093	YF 8 01-093	Telm 5	9
UF	YF 8 01-093	YF 8 01-093	Telm 5	10
UF	YF 8 01-093	YF 8 01-093	Telm 5	18
UF	YF 8 01-093	YF 8 01-093	Telm 5	19
UF	YF 8 01-093	YF 8 01-093	Telm 5	19.2
UF	YF 8 01-093	YF 8 01-093	Telm 5	21.5
UF	YF 8 01-093	YF 8 01-093	Telm 5	25.7
UF	YF 8 01-093	YF 8 01-093	Telm 5	24
UF	YF 8 01-093	YF 8 01-093	Telm 5	21
UF	YF 8 01-093	YF 8 01-093	Telm 5	19.4
UF	YF 8 01-093	YF 8 01-093	Telm 5	28.6
UF	YF 8 01-093	YF 8 01-093	Telm 5	18.2
UF	YF 8 01-093	YF 8 01-093	Telm 5	18
UF	YF 8 01-093	YF 8 01-093	Telm 5	19
UF	YF 8 01-093	YF 8 01-093	Telm 5	18
UF	YF 8 01-093	YF 8 01-093	Telm 5	16
UF	YF 8 01-093	YF 8 01-093	Telm 5	16
UF	YF 8 01-093	YF 8 01-093	Telm 5	12
UF	YF 8 01-093	YF 8 01-093	Telm 5	17
UF	YF 8 01-093	YF 8 01-093	Telm 5	20
UF	YF 8 01-093	YF 8 01-093	Telm 5	25
UF	YF 8 01-093	YF 8 01-093	Telm 5	22
UF	YF 8 01-093	YF 8 01-093	Telm 5	16
UF	YF 8 01-093	YF 8 01-093	Telm 5	23.5
UF	YF 8 01-093	YF 8 01-093	Telm 5	20.3
UF	YF 8 01-093	YF 8 01-093	Telm 5	25.1
UF	YF 8 01-093	YF 8 01-093	Telm 5	26.6
UF	YF 8 01-093	YF 8 01-093	Telm 5	25
UF	YF 8 01-093	YF 8 01-093	Telm 5	23
UF	YF 8 01-093	YF 8 01-093	Telm 5	18.2	complete
UF	YF 8 01-093	YF 8 01-093	Telm 5	19
UF	YF 8 01-093	YF 8 01-093	Telm 5	17
UF	YF 8 01-093	YF 8 01-093	Telm 5	15
UF	YF 8 01-093	YF 8 01-093	Telm 5	16.5
UF	YF 8 01-093	YF 8 01-093	Telm 5	12.5
UF	YF 8 01-093	YF 8 01-093	Telm 5	19
UF	YF 8 01-093	YF 8 01-093	Telm 5	17
UF	YF 8 01-093	YF 8 01-093	Telm 5	18
UF	YF 8 01-093	YF 8 01-093	Telm 5	17
UF	YF 8 01-093	YF 8 01-093	Telm 5	21
UF	YF 8 01-093	YF 8 01-093	Telm 5	17.2
UF	YF 8 01-093	YF 8 01-093	Telm 5	23
UF	YF 8 01-093	YF 8 01-093	Telm 5	20
UF	YF 8 01-093	YF 8 01-093	Telm 5	21.5
UF	YF 8 01-093	YF 8 01-093	Telm 5	23
UF	YF 8 01-093	YF 8 01-093	Telm 5	8
UF	YF 8 01-093	YF 8 01-093	Telm 5	8
UF	YF 8 01-093	YF 8 01-093	Telm 5	12
UF	YF 8 01-093	YF 8 01-093	Telm 5	21.4
UF	YF 8 01-093	YF 8 01-093	Telm 5	22
UF	YF 8 01-093	YF 8 01-093	Telm 5	16
UF	YF 8 01-093	YF 8 01-093	Telm 5	14
UF	YF 8 01-093	YF 8 01-093	Telm 5	23
UF	YF 8 01-093	YF 8 01-093	Telm 5	21
UF	YF 8 01-093	YF 8 01-093	Telm 5	17.2
UF	YF 8 01-093	YF 8 01-093	Telm 5	23
UF	YF 8 01-093	YF 8 01-093	Telm 5	20
UF	YF 8 01-093	YF 8 01-093	Telm 5	21.5
UF	YF 8 01-093	YF 8 01-093	Telm 5	23
UF	YF 8 01-093	YF 8 01-093	Telm 5	15
UF	YF 8 01-093	YF 8 01-093	Telm 5	16.7
UF	YF 8 01-093	YF 8 01-093	Telm 5	16.8
UF	YF 8 01-093	YF 8 01-093	Telm 5	16
UF	YF 8 01-093	YF 8 01-093	Telm 5	14
UF	YF 8 01-093	YF 8 01-093	Telm 5	19
UF	YF 8 01-093	YF 8 01-093	Telm 5	19
UF	YF 8 01-093	YF 8 01-093	Telm 5	18
UF	YF 8 01-093	YF 8 01-093	Telm 5	21
UF	YF 8 01-093	YF 8 01-093	Telm 5	19
UF	YF 8 01-093	YF 8 01-093	Telm 5	22.5
UF	YF 8 01-093	YF 8 01-093	Telm 5	21
UF	YF 8 01-093	YF 8 01-093	Telm 5	16.2
UF	YF 8 01-093	YF 8 01-093	Telm 5	18.5
UF	YF 8 01-093	YF 8 01-093	Telm 5	21
UF	YF 8 01-093	YF 8 01-093	Telm 5	16.4
UF	YF 8 01-093	YF 8 01-093	Telm 5	19.7
UF	YF 8 01-093	YF 8 01-093	Telm 5	12.5
UF	YF 8 01-093	YF 8 01-093	Telm 5	15
UF	YF 8 01-093	YF 8 01-093	Telm 5	17
UF	YF 8 01-093	YF 8 01-093	Telm 5	13
UF	YF 8 01-093	YF 8 01-093	Telm 5	20
UF	YF 8 01-093	YF 8 01-093	Telm 5	18
UF	YF 8 01-093	YF 8 01-093	Telm 5	11
UF	YF 8 01-093	YF 8 01-093	Telm 5	9
UF	YF 8 01-093	YF 8 01-093	Telm 5	15
UF	YF 8 01-093	YF 8 01-093	Telm 5	17
UF	YF 8 01-093	YF 8 01-093	Telm 5	21
UF	YF 8 01-093	YF 8 01-093	Telm 5	16
UF	YF 8 01-093	YF 8 01-093	Telm 5	17
UF	YF 8 01-093	YF 8 01-093	Telm 5	16
UF	YF 8 01-093	YF 8 01-093	Telm 5	14
UF	YF 8 01-093	YF 8 01-093	Telm 5	14
UF	YF 8 01-093	YF 8 01-093	Telm 5	15
UF	YF 8 01-093	YF 8 01-093	Telm 5	12
UF	YF 8 01-093	YF 8 01-093	Telm 5	16
UF	YF 8 01-093	YF 8 01-093	Telm 5	18
UF	YF 8 01-093	YF 8 01-093	Telm 5	15
UF	YF 8 01-093	YF 8 01-093	Telm 5	19
UF	YF 8 01-093	YF 8 01-093	Telm 5	19
UF	YF 8 01-093	YF 8 01-093	Telm 5	20
UF	YF 8 01-093	YF 8 01-093	Telm 5	20
UF	YF 8 01-093	YF 8 01-093	Telm 5	16
UF	YF 8 01-093	YF 8 01-093	Telm 5	20
PRI	58011	4182	Telm 5	21.6
PRI	62944	5125	Telm 7	27.9
PRI	62944	5125	Telm 7	22.5
PRI	62944	5125	Telm 7	39.8
PRI	62944	5125	Telm 7	30.2
PRI	62944	5125	Telm 7	28
PRI	62944	5125	Telm 7	27.7
PRI	62944	5125	Telm 7	25.7
PRI	62944	5125	Telm 7	27.4
PRI	62944	5125	Telm 7	21.3
PRI	62944	5125	Telm 7	26.7
PRI	62944	5125	Telm 7	29
PRI	62944	5125	Telm 7	17.3
PRI	62944	5125	Telm 7	20.2
PRI	62944	5125	Telm 7	19.3
PRI	62944	5125	Telm 7	12.3
PRI	62944	5125	Telm 7	15.2
PRI	62944	5125	Telm 7	21.5
PRI	62944	5125	Telm 7	15.6	complete
PRI	62944	5125	Telm 7	15.3	complete
PRI	59685	4668	Telm 7	18.5
PRI	59685	4668	Telm 7	17.8
PRI	59685	4668	Telm 7	16
PRI	59685	4668	Telm 7	16.8
PRI	59685	4668	Telm 7	15.6
PRI	59685	4668	Telm 7	22.3
PRI	59685	4668	Telm 7	17.3
PRI	59685	4668	Telm 7	16.8
PRI	59685	4668	Telm 7	19.8
PRI	59685	4668	Telm 7	17.3
PRI	59685	4668	Telm 7	15.5
PRI	59685	4668	Telm 7	15.8
PRI	59685	4668	Telm 7	14.2
PRI	59685	4668	Telm 7	17
PRI	59685	4668	Telm 7	10
PRI	59685	4668	Telm 7	14.8
PRI	59685	4668	Telm 7	13.4
PRI	59685	4668	Telm 7	10.2
PRI	59685	4668	Telm 7	9.6
PRI	59685	4668	Telm 7	14.6
PRI	59685	4668	Telm 7	15.3
PRI	59685	4668	Telm 7	12
PRI	59685	4668	Telm 7	14.1
PRI	59685	4668	Telm 7	15
PRI	59685	4668	Telm 7	10.5
PRI	59685	4668	Telm 7	10.9
PRI	59685	4668	Telm 7	15.7	complete
PRI	59685	4668	Telm 7	15.5	complete
PRI	59685	4668	Telm 7	17.6	incomplete
PRI	59685	4668	Telm 7	14.5	incomplete
PRI	59685	4668	Telm 7	12.5	incomplete
PRI	59685	4668	Telm 7	11
PRI	59685	4668	Telm 7	10	complete
PRI	59685	4668	Telm 7	11	complete
PRI	59685	4668	Telm 7	7	complete
PRI	59685	4668	Telm 7	10.5	complete
PRI	59685	4668	Telm 7	9.5	complete
PRI	59685	4668	Telm 7	9.2	complete
PRI	59685	4668	Telm 7	7.7	complete
PRI	59685	4668	Telm 7	6.8	complete
PRI	59685	4668	Telm 7	8	complete
PRI	59685	4668	Telm 7	10.3
PRI	59685	4668	Telm 7	10.6
PRI	59685	4668	Telm 7	14.4
PRI	59685	4668	Telm 7	9
PRI	59685	4668	Telm 7	9
PRI	59685	4668	Telm 7	10.8
PRI	59685	4668	Telm 7	11.4
PRI	59685	4668	Telm 7	14.4
PRI	59685	4668	Telm 7	12.5
PRI	59685	4668	Telm 7	12.4
PRI	59685	4668	Telm 7	13.2
PRI	59685	4668	Telm 7	10.2
PRI	59685	4668	Telm 7	11.8
PRI	59685	4668	Telm 7	12.6
PRI	59685	4668	Telm 7	11.8
PRI	59685	4668	Telm 7	7.9
PRI	59685	4668	Telm 7	9.1
PRI	59685	4668	Telm 7	9.8
PRI	59685	4668	Telm 7	8.8
PRI	59685	4668	Telm 7	7.5
PRI	59685	4668	Telm 7	7.5
PRI	59685	4668	Telm 7	12.4	incomplete
PRI	59685	4668	Telm 7	7.6
PRI	59685	4668	Telm 7	8.2
PRI	59685	4668	Telm 7	6.7
PRI	59685	4668	Telm 7	8
PRI	59685	4668	Telm 7	10.7
PRI	59685	4668	Telm 7	11.2
PRI	59685	4668	Telm 7	8.3
PRI	59685	4668	Telm 7	11.3
PRI	59685	4668	Telm 7	8.7
PRI	59685	4668	Telm 7	12
PRI	59685	4668	Telm 7	7.9
PRI	59685	4668	Telm 7	11.2
PRI	59685	4668	Telm 7	6.5
PRI	59685	4668	Telm 7	9.5
PRI	59685	4668	Telm 7	7.3
PRI	59685	4668	Telm 7	9.2
PRI	59685	4668	Telm 7	7.3
PRI	59685	4668	Telm 7	7
PRI	59685	4668	Telm 7	9.1
PRI	59685	4668	Telm 7	9
PRI	59685	4668	Telm 7	10.1
PRI	59685	4668	Telm 7	8.5
PRI	59685	4668	Telm 7	13.5
PRI	59685	4668	Telm 7	8
PRI	59685	4668	Telm 7	9.3
PRI	59685	4668	Telm 7	8.7
PRI	59685	4668	Telm 7	9.8
PRI	59685	4668	Telm 7	6.8
PRI	59685	4668	Telm 7	8.3
PRI	59685	4668	Telm 7	7.6
PRI	59685	4668	Telm 7	11.6
PRI	59685	4668	Telm 7	8.3
PRI	59685	4668	Telm 7	8.9
PRI	59685	4668	Telm 7	6
PRI	59685	4668	Telm 7	9
PRI	59685	4668	Telm 7	10.3
PRI	59685	4668	Telm 7	8.7
PRI	59685	4668	Telm 7	10.4
PRI	59685	4668	Telm 7	8.8
PRI	59685	4668	Telm 7	9.7
PRI	59685	4668	Telm 7	8.6
PRI	59685	4668	Telm 7	8.35
PRI	59685	4668	Telm 7	11.6
PRI	59685	4668	Telm 7	7.5
PRI	59685	4668	Telm 7	9
PRI	59685	4668	Telm 7	9.9
PRI	59685	4668	Telm 7	8.5
PRI	59685	4668	Telm 7	8.6
PRI	59685	4668	Telm 7	8
PRI	59685	4668	Telm 7	9.3
PRI	59685	4668	Telm 7	8.36
PRI	59685	4668	Telm 7	8.2
PRI	59685	4668	Telm 7	8.4
PRI	59685	4668	Telm 7	8.2
PRI	59685	4668	Telm 7	8.7
PRI	59685	4668	Telm 7	6.7
PRI	59685	4668	Telm 7	7
PRI	59685	4668	Telm 7	6
PRI	59685	4668	Telm 7	8.9
PRI	59685	4668	Telm 7	8.9
PRI	59685	4668	Telm 7	6.4
PRI	59685	4668	Telm 7	6.3
PRI	59685	4668	Telm 7	9.2
PRI	59685	4668	Telm 7	8	incomplete
PRI	59685	4668	Telm 7	7
PRI	59685	4668	Telm 7	6.6
PRI	59685	4668	Telm 7	7
PRI	59685	4668	Telm 7	7.3
PRI	59685	4668	Telm 7	5.1
PRI	59685	4668	Telm 7	5.7
PRI	63012	4760	Telm 7	20
PRI	63012	4760	Telm 7	21.7
PRI	63012	4760	Telm 7	18.3
PRI	63012	4760	Telm 7	21.1
PRI	63012	4760	Telm 7	22.6
PRI	63012	4760	Telm 7	19.5
PRI	63012	4760	Telm 7	21.2
PRI	63012	4760	Telm 7	21.5
PRI	63012	4760	Telm 7	17.8
PRI	63012	4760	Telm 7	25
PRI	62624	4760	Telm 7	26
PRI	62624	4760	Telm 7	24.6
PRI	62624	4760	Telm 7	20
PRI	62624	4760	Telm 7	19
PRI	62624	4760	Telm 7	11.4
PRI	62624	4760	Telm 7	19
PRI	62624	4760	Telm 7	19.7
PRI	59464	4216	Telm 7	21.3
PRI	59464	4216	Telm 7	32.3
PRI	59464	4216	Telm 7	25.3
PRI	59402	4211	Telm 7	23
PRI	59402	4211	Telm 7	26
PRI	59402	4211	Telm 7	25.36
PRI	59402	4211	Telm 7	21.4
PRI	59173	4255	Telm 7	19.4
PRI	59173	4255	Telm 7	13
PRI	59396	4209	Telm 7	20
PRI	59396	4209	Telm 7	30.3
PRI	59396	4209	Telm 7	37.3
PRI	59396	4209	Telm 7	37
PRI	59396	4209	Telm 7	18
PRI	59396	4209	Telm 7	11.6
PRI	65891	4760	Telm 7	18.4
PRI	65891	4760	Telm 7	18.4
PRI	65891	4760	Telm 7	25.7
PRI	65891	4760	Telm 7	23
PRI	65891	4760	Telm 7	21.2
PRI	65891	4760	Telm 7	22.6
PRI	65891	4760	Telm 7	34.6
PRI	65891	4760	Telm 7	23
PRI	65891	4760	Telm 7	20.5
PRI	65891	4760	Telm 7	21
PRI	65891	4760	Telm 7	23.2
PRI	65891	4760	Telm 7	15.5
PRI	65891	4760	Telm 7	14
PRI	65891	4760	Telm 7	15.4
PRI	65891	4760	Telm 7	15.7
PRI	62589	5129	Telm 7	28.5
PRI	62589	5129	Telm 7	23.5
PRI	62589	5129	Telm 7	29.3
PRI	62589	5129	Telm 7	24.7
PRI	62589	5129	Telm 7	35.4
PRI	62589	5129	Telm 7	33
PRI	62589	5129	Telm 7	30
PRI	62589	5129	Telm 7	19
PRI	62589	5129	Telm 7	17.8
PRI	62589	5129	Telm 7	18.6
PRI	62589	5129	Telm 7	11.9
PRI	62589	5129	Telm 7	11.5
PRI	62589	5129	Telm 7	11.7
PRI	62589	5129	Telm 7	20.2
PRI	62589	5129	Telm 7	13.6
PRI	62589	5129	Telm 7	20
PRI	62589	5129	Telm 7	22.5
PRI	62589	5129	Telm 7	20
PRI	62589	5129	Telm 7	12.5
PRI	62589	5129	Telm 7	17.3	complete
PRI	62589	5129	Telm 7	16.1	complete
PRI	62589	5129	Telm 7	17	complete
PRI	65683	4764	Telm 7	49
PRI	65683	4764	Telm 7	30
PRI	59989	4683	Telm 7	33.5
PRI	59989	4683	Telm 7	8
PRI	60405	4695	Telm 7	13
PRI	62958	4773	Telm 7	43.8
PRI	62958	4773	Telm 7	43
PRI	62958	4773	Telm 7	47
PRI	62685	5130	Telm 7	28.6
PRI	62575	5130	Telm 7	21
PRI	59700	4668	Telm 7	17.5
PRI	59700	4668	Telm 7	23.9
PRI	59700	4668	Telm 7	21.3
PRI	59700	4668	Telm 7	20.3
PRI	59700	4668	Telm 7	21.3
PRI	59700	4668	Telm 7	18.39
PRI	59700	4668	Telm 7	19
PRI	65483	4760	Telm 7	28
PRI	65483	4760	Telm 7	29.6
PRI	65483	4760	Telm 7	22.4
PRI	65483	4760	Telm 7	18
PRI	65500	5124	Telm 7	32.9
PRI	59477	4220	Telm 7	21.5
PRI	59477	4220	Telm 7	31.6
PRI	59477	4220	Telm 7	21
PRI	59075	4716	Telm 7	16.7
PRI	63005	5127	Telm 7	20.5
PRI	63005	5127	Telm 7	19.6
PRI	63005	5127	Telm 7	20.5	complete
PRI	63005	5127	Telm 7	29
PRI	63005	5127	Telm 7	20.5
PRI	63005	5127	Telm 7	33
PRI	65869	5804	Telm 7	25
PRI	62763	4209	Telm 7	21
PRI	62763	4209	Telm 7	32
PRI	62763	4209	Telm 7	2.4
PRI	62763	4209	Telm 7	18.5
PRI	62763	4209	Telm 7	13.8
PRI	62763	4209	Telm 7	13.4
PRI	62763	4209	Telm 7	15.6
UF	153354	YF178	Telm 7	27
UF	153354	YF178	Telm 7	32
UF	153354	YF178	Telm 7	15.5
UF	153354	YF178	Telm 7	19.5
UF	153354	YF178	Telm 7	22
UF	153354	YF178	Telm 7	18.9	complete
UF	153354	YF178	Telm 7	22
UF	153354	YF178	Telm 7	21.4
UF	153354	YF178	Telm 7	25
UF	153354	YF178	Telm 7	32.7
[truncated: 75 more rows]
